# Supplementary material
Source: publisher site journal article supplement (https://www.dovepress.com/get_supplementary_file.php?f=174223.xlsx)
Supplement: Supplementary file 1 [file get_supplementary_file.php]

## Sheet: Gene_expression_data
The expression levels of various genes in SW780 and SV-HUC-1 cells obtained by RNA sequencing.
Ensembl.Gene	Gene.Name	chr	strand	start	end	SVHUC1	sw780
ENSG00000000003	TSPAN6	X	-	100627109	100639991	3.15733	9.35019
ENSG00000000005	TNMD	X	+	100584802	100599885	0	0
ENSG00000000419	DPM1	20	-	50934867	50958555	39.3898	15.2942
ENSG00000000457	SCYL3	1	-	169849631	169894267	2.21455	3.39167
ENSG00000000460	C1orf112	1	+	169662007	169854080	5.79617	3.72616
ENSG00000000938	FGR	1	-	27612064	27635277	0.206498	0.480765
ENSG00000000971	CFH	1	+	196651878	196747504	0	5.32648
ENSG00000001036	FUCA2	6	-	143494811	143511690	16.298	33.4473
ENSG00000001084	GCLC	6	-	53497341	53616970	2.76546	17.8817
ENSG00000001167	NFYA	6	+	41072945	41099976	3.25254	3.18233
ENSG00000001460	STPG1	1	-	24356999	24416934	0.994254	2.15975
ENSG00000001461	NIPAL3	1	+	24415794	24472976	2.31498	3.45378
ENSG00000001497	LAS1L	X	-	65512582	65534775	9.52105	15.3864
ENSG00000001561	ENPP4	6	+	46129993	46146699	2.03824	0.976702
ENSG00000001617	SEMA3F	3	+	50155045	50189075	6.96661	0
ENSG00000001626	CFTR	7	+	117465784	117715971	0.00281221	0
ENSG00000001629	ANKIB1	7	+	92246234	92401384	11.6256	14.8604
ENSG00000001630	CYP51A1	7	-	92112151	92142952	18.6764	32.2953
ENSG00000001631	KRIT1	7	-	92198969	92246166	4.65565	1.99613
ENSG00000002016	RAD52	12	-	912077	990053	1.58712	3.2642
ENSG00000002079	MYH16	7	+	99238794	99311130	0	0
ENSG00000002330	BAD	11	-	64269830	64284704	6.57019	11.5501
ENSG00000002549	LAP3	4	+	17577192	17607972	8.2092	11.4493
ENSG00000002586	CD99	X	+	2691179	2741309	22.7246	28.6509
ENSG00000002587	HS3ST1	4	-	11393150	11429765	0.158035	7.0132
ENSG00000002726	AOC1	7	+	150824627	150861504	0.912095	7.43498
ENSG00000002745	WNT16	7	+	121325367	121341104	0.0479018	0
ENSG00000002746	HECW1	7	+	43112599	43566001	0.000487806	0.00290099
ENSG00000002822	MAD1L1	7	-	1815793	2233243	3.35637	6.90817
ENSG00000002834	LASP1	17	+	38869859	38921770	33.092	43.4573
ENSG00000002919	SNX11	17	+	48103357	48123074	3.66193	3.48612
ENSG00000002933	TMEM176A	7	+	150800403	150805120	0.461342	0
ENSG00000003056	M6PR	12	-	8940363	8949955	8.4218	19.6424
ENSG00000003096	KLHL13	X	-	117897813	118117340	0.0199949	0.296353
ENSG00000003137	CYP26B1	2	-	72129238	72148038	0.568217	2.35829
ENSG00000003147	ICA1	7	-	8113184	8262687	0.616426	4.80503
ENSG00000003249	DBNDD1	16	-	90004865	90020128	1.37038	0.389475
ENSG00000003393	ALS2	2	-	201700554	201781189	7.33075	3.41604
ENSG00000003400	CASP10	2	+	201182881	201229406	0.331511	2.81677
ENSG00000003402	CFLAR	2	+	201116104	201176687	0.86655	1.49193
ENSG00000003436	TFPI	2	-	187464230	187565760	0.417018	0.530301
ENSG00000003509	NDUFAF7	2	+	37231631	37253403	4.08039	2.6199
ENSG00000003756	RBM5	3	+	50088908	50119021	11.9371	0.00986971
ENSG00000003987	MTMR7	8	-	17298030	17413528	1.15096	0.358728
ENSG00000003989	SLC7A2	8	+	17497088	17570573	1.35535	2.81904
ENSG00000004059	ARF5	7	+	127588345	127591705	26.0661	36.2589
ENSG00000004139	SARM1	17	+	28364356	28404049	3.06239	0.511416
ENSG00000004142	POLDIP2	17	-	28347177	28357522	35.7943	51.5043
ENSG00000004399	PLXND1	3	-	129555175	129606818	5.3922	2.10796
ENSG00000004455	AK2	1	-	33007940	33080996	21.4008	27.3133
ENSG00000004468	CD38	4	+	15778275	15853230	0	0.0552693
ENSG00000004478	FKBP4	12	+	2794953	2805423	6.89581	21.7143
ENSG00000004487	KDM1A	1	+	23019448	23083689	42.8876	55.0126
ENSG00000004534	RBM6	3	+	49940007	50100045	5.52147	1.11405
ENSG00000004660	CAMKK1	17	-	3860315	3894891	2.22145	1.6696
ENSG00000004700	RECQL	12	-	21468911	21501669	12.5271	5.56656
ENSG00000004766	VPS50	7	+	93232340	93361121	2.59398	1.73656
ENSG00000004776	HSPB6	19	-	35754568	35758079	0.130366	0.327012
ENSG00000004777	ARHGAP33	19	+	35774532	35788822	1.23245	0.726488
ENSG00000004779	NDUFAB1	16	-	23581002	23596356	12.7915	26.1187
ENSG00000004799	PDK4	7	-	95583499	95596491	0.147964	0.247713
ENSG00000004809	SLC22A16	6	-	110424687	110476641	0	0
ENSG00000004838	ZMYND10	3	-	50341110	50346852	0.486855	0
ENSG00000004846	ABCB5	7	+	20615207	20777038	0	0
ENSG00000004848	ARX	X	-	25003694	25015948	0.008356	0.013077
ENSG00000004864	SLC25A13	7	-	96120220	96322147	16.4429	16.4641
ENSG00000004866	ST7	7	+	116953238	117230103	2.79272	3.04696
ENSG00000004897	CDC27	17	-	47117703	47189422	13.7085	8.12033
ENSG00000004939	SLC4A1	17	-	44248385	44268141	0	0.0192299
ENSG00000004948	CALCR	7	-	93424487	93574730	0	0.0159172
ENSG00000004961	HCCS	X	+	11111301	11123078	4.90675	10.3709
ENSG00000004975	DVL2	17	-	7225341	7234545	7.29882	8.1973
ENSG00000005001	PRSS22	16	-	2852727	2858170	0.998772	11.4584
ENSG00000005007	UPF1	19	+	18831938	18868236	42.4271	21.9149
ENSG00000005020	SKAP2	7	-	26667062	26995239	2.93576	8.21849
ENSG00000005022	SLC25A5	X	+	119468400	119471319	90.9119	280.024
ENSG00000005059	CCDC109B	4	+	109560205	109688726	4.20804	1.78738
ENSG00000005073	HOXA11	7	-	27181510	27185223	0.0022572	0.417548
ENSG00000005075	POLR2J	7	-	102473118	102478907	7.7835	6.07379
ENSG00000005100	DHX33	17	-	5440912	5469060	8.99257	8.4679
ENSG00000005102	MEOX1	17	-	43640388	43661954	0	0
ENSG00000005108	THSD7A	7	-	11370357	11832198	0	0.141949
ENSG00000005156	LIG3	17	+	34980494	35009743	4.15327	6.35792
ENSG00000005175	RPAP3	12	-	47661249	47706061	3.34628	2.87819
ENSG00000005187	ACSM3	16	+	20610243	20797581	0.0511617	0.0341995
ENSG00000005189	AC004381.6	16	+	20806429	20849668	3.87323	3.53206
ENSG00000005194	CIAPIN1	16	-	57428169	57447528	14.0073	19.2618
ENSG00000005206	SPPL2B	19	+	2328615	2354806	1.01929	2.40985
ENSG00000005238	FAM214B	9	-	35104112	35116341	1.1883	0.482171
ENSG00000005243	COPZ2	17	-	48026167	48038030	1.13962	0.156062
ENSG00000005249	PRKAR2B	7	+	107044649	107161811	3.55603	0.129489
ENSG00000005302	MSL3	X	+	11758159	11775753	3.8576	2.48686
ENSG00000005339	CREBBP	16	-	3725054	3880726	16.3869	6.69405
ENSG00000005379	BZRAP1	17	-	58301228	58328760	0.0705075	0.00111909
ENSG00000005381	MPO	17	-	58269856	58280935	0.00681569	0
ENSG00000005421	PON1	7	-	95297676	95324707	0	0
ENSG00000005436	GCFC2	2	-	75652000	75710989	2.84833	1.09093
ENSG00000005448	WDR54	2	+	74421678	74425755	8.87953	16.4041
ENSG00000005469	CROT	7	+	87345681	87399795	5.31194	6.73648
ENSG00000005471	ABCB4	7	-	87401697	87480435	0.00960959	0.0225906
ENSG00000005483	KMT2E	7	+	105014179	105114361	6.32212	4.36319
ENSG00000005486	RHBDD2	7	+	75842602	75888926	13.6063	15.4654
ENSG00000005513	SOX8	16	+	981808	986979	0.278186	0
ENSG00000005700	IBTK	6	-	82169983	82247754	14.0417	6.09615
ENSG00000005801	ZNF195	11	-	3339261	3379222	1.85604	1.04655
ENSG00000005810	MYCBP2	13	-	77044655	77327050	8.74778	19.9466
ENSG00000005812	FBXL3	13	-	76992598	77027195	3.73883	5.60835
ENSG00000005844	ITGAL	16	+	30472658	30523185	0.0334542	0.521424
ENSG00000005882	PDK2	17	+	50094737	50112152	5.20168	3.43531
ENSG00000005884	ITGA3	17	+	50055968	50090481	52.615	110.935
ENSG00000005889	ZFX	X	+	24149173	24216255	5.47872	10.4922
ENSG00000005893	LAMP2	X	-	120427827	120469365	17.073	8.66047
ENSG00000005961	ITGA2B	17	-	44372180	44389505	0.531608	0.113278
ENSG00000005981	ASB4	7	+	95478444	95540232	0.0156386	0.0110387
ENSG00000006007	GDE1	16	-	19501689	19522145	6.44941	8.11955
ENSG00000006015	C19orf60	19	+	18588685	18592336	2.43631	2.19686
ENSG00000006016	CRLF1	19	-	18572220	18607741	6.1342	0.69759
ENSG00000006025	OSBPL7	17	-	47807372	47821834	1.52201	1.63523
ENSG00000006042	TMEM98	17	+	32927910	32945106	3.32982	2.40398
ENSG00000006047	YBX2	17	-	7288252	7294615	0.406715	0.0243997
ENSG00000006059	KRT33A	17	-	41346092	41350812	0.033408	0.458299
ENSG00000006062	MAP3K14	17	-	45263121	45317040	5.40755	2.16478
ENSG00000006071	ABCC8	11	-	17392885	17476845	0.211977	0.00939003
ENSG00000006116	CACNG3	16	+	24255553	24362801	0	0
ENSG00000006118	TMEM132A	11	+	60924463	60937159	2.58609	3.13568
ENSG00000006125	AP2B1	17	+	35578046	35726409	45.347	42.2804
ENSG00000006128	TAC1	7	+	97731908	97740472	0	0
ENSG00000006194	ZNF263	16	+	3263800	3301401	3.02236	2.46453
ENSG00000006210	CX3CL1	16	+	57372458	57385048	0	0.029694
ENSG00000006282	SPATA20	17	+	50543058	50555852	5.55632	6.4181
ENSG00000006283	CACNA1G	17	+	50561068	50627474	0.0567643	0.0126225
ENSG00000006327	TNFRSF12A	16	+	3018445	3022383	67.5722	71.2302
ENSG00000006377	DLX6	7	+	97005548	97011039	0.281369	0.0221074
ENSG00000006432	MAP3K9	14	-	70722526	70809534	4.93751	2.33139
ENSG00000006451	RALA	7	+	39623483	39708124	37.8678	13.3006
ENSG00000006453	BAIAP2L1	7	-	98291651	98401068	9.74848	12.0611
ENSG00000006459	KDM7A	7	-	140084746	140177035	1.5697	0.358387
ENSG00000006468	ETV1	7	-	13891228	13991425	0.00852905	0.0444784
ENSG00000006530	AGK	7	+	141551189	141655244	3.64934	5.55911
ENSG00000006534	ALDH3B1	11	+	68008578	68029282	1.84512	1.00804
ENSG00000006555	TTC22	1	-	54779712	54801267	0.165722	2.17425
ENSG00000006576	PHTF2	7	+	77798792	77957503	3.72818	2.72843
ENSG00000006606	CCL26	7	-	75769533	75789896	0	0
ENSG00000006607	FARP2	2	+	241356243	241494841	6.2741	5.74478
ENSG00000006611	USH1C	11	-	17493895	17544416	0.0318042	0
ENSG00000006625	GGCT	7	-	30496621	30504844	7.87079	8.78605
ENSG00000006634	DBF4	7	+	87876216	87909541	2.13976	2.27319
ENSG00000006638	TBXA2R	19	-	3594506	3606840	0.0551536	0
ENSG00000006652	IFRD1	7	+	112422968	112481017	6.83636	5.20157
ENSG00000006659	LGALS14	19	+	39704306	39709444	0	0
ENSG00000006695	COX10	17	+	14069496	14208677	3.39159	5.52175
ENSG00000006704	GTF2IRD1	7	+	74453790	74602604	13.3985	6.88471
ENSG00000006712	PAF1	19	-	39385852	39391195	12.3135	19.9973
ENSG00000006715	VPS41	7	-	38722963	38932394	3.87527	3.63076
ENSG00000006740	ARHGAP44	17	+	12789539	12991643	0.649982	0.680838
ENSG00000006744	ELAC2	17	-	12992391	13018187	13.9173	20.7697
ENSG00000006747	SCIN	7	+	12570577	12660179	2.708	0.0521075
ENSG00000006756	ARSD	X	-	2903970	2929351	2.88421	18.2908
ENSG00000006757	PNPLA4	X	-	7898247	7927739	2.59989	4.96897
ENSG00000006788	MYH13	17	-	10298084	10373130	0	0
ENSG00000006831	ADIPOR2	12	+	1688574	1788678	4.22547	25.2942
ENSG00000006837	CDKL3	5	-	134286350	134371047	0.147007	0.0415636
ENSG00000007001	UPP2	2	+	157876702	158136154	0	0.0429769
ENSG00000007038	PRSS21	16	+	2817180	2826304	1.84294	0
ENSG00000007047	MARK4	19	+	45079288	45305283	5.32657	7.32083
ENSG00000007062	PROM1	4	-	15963076	16084378	0.307335	0.0166044
ENSG00000007080	CCDC124	19	+	17933016	17943991	12.3926	3.42134
ENSG00000007129	CEACAM21	19	+	41549518	41586844	0.00596185	0.0132862
ENSG00000007168	PAFAH1B1	17	+	2593210	2685615	18.2229	17.6688
ENSG00000007171	NOS2	17	-	27756766	27800499	0.017245	0.012173
ENSG00000007174	DNAH9	17	+	11598431	11969748	0.00141535	0
ENSG00000007202	KIAA0100	17	-	28614440	28645454	41.8436	73.9949
ENSG00000007216	SLC13A2	17	+	28473293	28497781	0	0
ENSG00000007237	GAS7	17	-	9910609	10198551	0.364285	0.0298274
ENSG00000007255	TRAPPC6A	19	-	45162928	45178237	15.4569	10.1757
ENSG00000007264	MATK	19	-	3777970	3802129	0.655779	0
ENSG00000007306	CEACAM7	19	-	41673307	41706976	0	0.0540141
ENSG00000007312	CD79B	17	-	63928740	63932354	0.011554	0.012097
ENSG00000007314	SCN4A	17	-	63938554	63972918	0.00874194	0.0322573
ENSG00000007341	ST7L	1	-	112523518	112620825	1.06064	1.86702
ENSG00000007350	TKTL1	X	+	154295671	154330350	0	0
ENSG00000007372	PAX6	11	-	31784792	31817961	0.0697575	0.00335611
ENSG00000007376	RPUSD1	16	-	784974	788397	5.11116	13.8754
ENSG00000007384	RHBDF1	16	-	58059	76355	3.58648	6.32145
ENSG00000007392	LUC7L	16	-	188969	229463	4.49036	3.17617
ENSG00000007402	CACNA2D2	3	-	50362799	50504244	1.74001	0
ENSG00000007516	BAIAP3	16	+	1333601	1349441	0.358912	0.768093
ENSG00000007520	TSR3	16	-	1349240	1351911	20.8581	21.9319
ENSG00000007541	PIGQ	16	+	566995	584136	9.23488	9.47316
ENSG00000007545	CRAMP1	16	+	1612325	1677908	2.57078	1.8829
ENSG00000007866	TEAD3	6	-	35473597	35497076	9.21408	16.7429
ENSG00000007908	SELE	1	-	169722641	169764705	0	0
ENSG00000007923	DNAJC11	1	-	6634168	6701924	11.3386	21.289
ENSG00000007933	FMO3	1	+	171090877	171117819	0	0
ENSG00000007944	MYLIP	6	+	16129125	16148248	5.57191	4.31209
ENSG00000007952	NOX1	X	-	100843324	100874345	0.0522998	0.068507
ENSG00000007968	E2F2	1	-	23506430	23531220	3.27689	1.58878
ENSG00000008018	PSMB1	6	-	170535117	170553341	21.3432	30.7967
ENSG00000008056	SYN1	X	-	47571898	47619853	0.601602	0.019933
ENSG00000008083	JARID2	6	+	15246296	15522040	26.9203	2.79767
ENSG00000008086	CDKL5	X	+	18425583	18653629	0.248358	1.65063
ENSG00000008118	CAMK1G	1	+	209583717	209613938	0.129574	0.338813
ENSG00000008128	CDK11A	1	-	1702730	1724324	1.22013	2.28922
ENSG00000008130	NADK	1	-	1751232	1780457	9.18885	19.9612
ENSG00000008196	TFAP2B	6	+	50818723	50847613	0	0
ENSG00000008197	TFAP2D	6	+	50713828	50772988	0	0
ENSG00000008226	DLEC1	3	+	38039205	38124025	0.128751	0.542515
ENSG00000008256	CYTH3	7	-	6161776	6272644	11.7834	3.78772
ENSG00000008277	ADAM22	7	+	87934143	88202889	0.110929	0.379263
ENSG00000008282	SYPL1	7	-	106090503	106112576	13.9228	42.8923
ENSG00000008283	CYB561	17	-	63432304	63446378	4.43882	10.2313
ENSG00000008294	SPAG9	17	-	50962174	51120865	11.0848	11.3131
ENSG00000008300	CELSR3	3	-	48636469	48662915	2.55246	5.29059
ENSG00000008311	AASS	7	-	122075647	122144280	0.108751	2.58687
ENSG00000008323	PLEKHG6	12	+	6310436	6328506	3.33467	10.6607
ENSG00000008324	SS18L2	3	+	42581840	42595114	9.77519	5.1087
ENSG00000008382	MPND	19	+	4343527	4360086	2.43449	4.31541
ENSG00000008394	MGST1	12	+	16347142	16609259	2.92818	10.3843
ENSG00000008405	CRY1	12	-	106991364	107093829	8.33985	5.40512
ENSG00000008438	PGLYRP1	19	-	46019153	46023065	0.147647	0.334389
ENSG00000008441	NFIX	19	+	12995608	13098796	13.7575	0.537578
ENSG00000008513	ST3GAL1	8	-	133454848	133571940	1.46949	7.45841
ENSG00000008516	MMP25	16	+	3046681	3060726	0.504248	0.25909
ENSG00000008517	IL32	16	+	3065297	3082192	1.4288	1.28013
ENSG00000008710	PKD1	16	-	2088710	2135898	10.6384	6.63137
ENSG00000008735	MAPK8IP2	22	+	50600685	50613981	2.70395	0.0831278
ENSG00000008838	MED24	17	-	40019097	40061215	6.57382	9.47972
ENSG00000008853	RHOBTB2	8	+	22987417	23020199	9.33731	17.7087
ENSG00000008869	HEATR5B	2	-	36968383	37084342	9.28463	7.78438
ENSG00000008952	SEC62	3	+	169966635	169998373	9.46487	3.48748
ENSG00000008988	RPS20	8	-	56067295	56074581	67.9223	65.0276
ENSG00000009307	CSDE1	1	-	114716913	114758676	101.346	75.2521
ENSG00000009335	UBE3C	7	+	157138913	157269372	21.5447	16.0636
ENSG00000009413	REV3L	6	-	111299028	111483715	7.23665	2.48079
ENSG00000009694	TENM1	X	-	124375903	124963817	0.00186328	0.361212
ENSG00000009709	PAX7	1	+	18631006	18748866	0	0
ENSG00000009724	MASP2	1	-	11026523	11047233	0.587779	0.596408
ENSG00000009765	IYD	6	+	150368892	150405969	0	0.033528
ENSG00000009780	FAM76A	1	+	27725979	27763122	3.38865	1.96271
ENSG00000009790	TRAF3IP3	1	+	209756032	209782320	0.0772871	0.0077311
ENSG00000009830	POMT2	14	-	77274956	77320884	2.80212	2.56888
ENSG00000009844	VTA1	6	+	142147162	142224689	9.74142	5.51413
ENSG00000009950	MLXIPL	7	-	73593194	73624543	0.546936	0.345408
ENSG00000009954	BAZ1B	7	-	73440398	73522278	39.8091	25.4662
ENSG00000010017	RANBP9	6	-	13621498	13711564	50.0454	15.013
ENSG00000010030	ETV7	6	-	36354091	36387800	1.1695	4.75592
ENSG00000010072	SPRTN	1	+	231337104	231355023	1.63549	2.59933
ENSG00000010165	METTL13	1	+	171781664	171814023	12.6214	11.6785
ENSG00000010219	DYRK4	12	+	4562204	4615302	0.51151	0.173049
ENSG00000010244	ZNF207	17	+	32350117	32381886	11.9997	16.9713
ENSG00000010256	UQCRC1	3	-	48599002	48610976	75.8114	73.913
ENSG00000010270	STARD3NL	7	+	38178222	38230671	4.80395	5.92821
ENSG00000010278	CD9	12	+	6199715	6238271	19.2373	88.5435
ENSG00000010282	HHATL	3	-	42692663	42702827	0.211338	0
ENSG00000010292	NCAPD2	12	+	6493356	6531955	29.968	41.5714
ENSG00000010295	IFFO1	12	-	6538375	6556083	0.0877409	0.0484011
ENSG00000010310	GIPR	19	+	45668244	45683724	0.211545	0.231733
ENSG00000010318	PHF7	3	+	52410561	52423641	1.35115	0.783173
ENSG00000010319	SEMA3G	3	-	52433053	52445085	0.00719354	0.0795517
ENSG00000010322	NISCH	3	+	52455118	52493071	7.46213	4.51646
ENSG00000010327	STAB1	3	+	52495338	52524495	0.00469855	0.00602447
ENSG00000010361	FUZ	19	-	49806869	49817376	2.10059	5.02581
ENSG00000010379	SLC6A13	12	-	220621	262873	0.00570563	0.0298051
ENSG00000010404	IDS	X	-	149476990	149521096	5.30286	5.62476
ENSG00000010438	PRSS3	9	+	33750466	33799231	0.68249	0.0313021
ENSG00000010539	ZNF200	16	-	3222325	3236221	0.680421	1.27979
ENSG00000010610	CD4	12	+	6786858	6820808	0	0.0401144
ENSG00000010626	LRRC23	12	+	6873569	6914243	1.21484	1.73681
ENSG00000010671	BTK	X	-	101349447	101390796	0.0317532	0.0136499
ENSG00000010704	HFE	6	+	26087281	26098343	0.27394	2.37301
ENSG00000010803	SCMH1	1	-	41027200	41242154	4.6559	6.04383
ENSG00000010810	FYN	6	-	111660332	111873452	6.98199	5.55524
ENSG00000010818	HIVEP2	6	-	142751467	142945201	3.38829	6.09865
ENSG00000010932	FMO1	1	+	171248471	171285978	0	0
ENSG00000011007	TCEB3	1	+	23743155	23762059	12.0224	15.1047
ENSG00000011009	LYPLA2	1	+	23790970	23795539	8.097	20.9734
ENSG00000011021	CLCN6	1	+	11806096	11843144	3.57849	3.84791
ENSG00000011028	MRC2	17	+	62627401	62693597	3.4429	0.618448
ENSG00000011052	NME1-NME2	17	+	51153590	51171744	57.0076	55.9385
ENSG00000011083	SLC6A7	5	+	150189957	150222788	0.0280037	0
ENSG00000011105	TSPAN9	12	+	3077355	3286564	1.14958	3.07168
ENSG00000011114	BTBD7	14	-	93237550	93333092	5.33958	10.5328
ENSG00000011132	APBA3	19	-	3750819	3761699	1.24928	2.36736
ENSG00000011143	MKS1	17	-	58205437	58219605	5.21088	9.63159
ENSG00000011198	ABHD5	3	+	43690113	43734371	5.04164	7.78652
ENSG00000011201	ANOS1	X	-	8528874	8732187	4.57738	0.0290145
ENSG00000011243	AKAP8L	19	-	15380048	15419141	4.12742	2.66532
ENSG00000011258	MBTD1	17	-	51177425	51260163	2.2044	1.81613
ENSG00000011260	UTP18	17	+	51260528	51297936	22.7417	11.1078
ENSG00000011275	RNF216	7	-	5620047	5781739	9.21925	9.79721
ENSG00000011295	TTC19	17	+	15999380	16045015	12.3114	2.27461
ENSG00000011304	PTBP1	19	+	797075	812327	30.5468	35.674
ENSG00000011332	DPF1	19	-	38211006	38229714	0.740606	1.51039
ENSG00000011347	SYT7	11	-	61515313	61581148	1.75556	0.223872
ENSG00000011376	LARS2	3	+	45388506	45549421	6.89592	9.94387
ENSG00000011405	PIK3C2A	11	-	17077730	17207983	11.9342	2.3051
ENSG00000011422	PLAUR	19	-	43646095	43670547	4.58934	0.992334
ENSG00000011426	ANLN	7	+	36389806	36453791	69.3697	17.5337
ENSG00000011451	WIZ	19	-	15419980	15449951	8.69563	4.7808
ENSG00000011454	RABGAP1	9	+	122940833	123104866	20.5155	0.0977226
ENSG00000011465	DCN	12	-	91140484	91183123	0	0
ENSG00000011478	QPCTL	19	+	45692483	45703989	3.35356	5.11708
ENSG00000011485	PPP5C	19	+	46346994	46392981	6.06526	14.7392
ENSG00000011523	CEP68	2	+	65056366	65087004	3.25978	1.92847
ENSG00000011566	MAP4K3	2	-	39249266	39437312	9.70426	6.31964
ENSG00000011590	ZBTB32	19	+	35704527	35717038	0.693966	1.09857
ENSG00000011600	TYROBP	19	-	35904401	35908295	0	0.00554582
ENSG00000011638	TMEM159	16	+	21158377	21180616	3.84016	7.84749
ENSG00000011677	GABRA3	X	-	152166234	152451358	0.0171373	1.02325
ENSG00000012048	BRCA1	17	-	43044295	43170245	14.8458	5.02626
ENSG00000012061	ERCC1	19	-	45407333	45478828	4.92847	16.436
ENSG00000012124	CD22	19	+	35319261	35347355	2.67266	0.00403235
ENSG00000012171	SEMA3B	3	+	50267558	50277546	1.67918	0
ENSG00000012174	MBTPS2	X	+	21839636	21885424	2.42206	2.87811
ENSG00000012211	PRICKLE3	X	-	49175264	49186528	2.7454	8.04043
ENSG00000012223	LTF	3	-	46435645	46485234	0.067535	0.0193957
ENSG00000012232	EXTL3	8	+	28600469	28755599	4.52938	11.4521
ENSG00000012504	NR1H4	12	+	100473708	100564413	0	0
ENSG00000012660	ELOVL5	6	-	53267398	53349179	9.77837	7.92308
ENSG00000012779	ALOX5	10	+	45374176	45446119	1.23976	11.7951
ENSG00000012817	KDM5D	Y	-	19703865	19744939	3.93663	0
ENSG00000012822	CALCOCO1	12	-	53708517	53727745	2.34471	1.77636
ENSG00000012963	UBR7	14	+	93207056	93229215	16.3228	23.9511
ENSG00000012983	MAP4K5	14	-	50418501	50561126	8.71523	4.65736
ENSG00000013016	EHD3	2	+	31234337	31269447	0.549628	1.33943
ENSG00000013275	PSMC4	19	+	39971005	39981441	38.7331	108.241
ENSG00000013288	MAN2B2	4	+	6575175	6623362	3.35236	7.19168
ENSG00000013293	SLC7A14	3	-	170459584	170586074	0.0677062	0.00243036
ENSG00000013297	CLDN11	3	+	170418865	170860380	1.26786	0.0835423
ENSG00000013306	SLC25A39	17	-	44319625	44324870	19.0133	22.0946
ENSG00000013364	MVP	16	+	29820394	29848039	5.17649	14.3148
ENSG00000013374	NUB1	7	+	151341699	151378449	15.6806	7.30111
ENSG00000013375	PGM3	6	-	83161150	83193936	6.63183	3.39714
ENSG00000013392	RWDD2A	6	+	83193379	83198932	0.443146	0.67431
ENSG00000013441	CLK1	2	-	200853009	200864744	12.5877	2.03184
ENSG00000013503	POLR3B	12	+	106357658	106510198	7.74003	9.77164
ENSG00000013523	ANGEL1	14	-	76786178	76826246	2.15613	7.49388
ENSG00000013561	RNF14	5	+	141958328	141990291	15.8745	9.35524
ENSG00000013563	DNASE1L1	X	-	154401238	154412112	1.54149	3.47969
ENSG00000013573	DDX11	12	+	31073845	31104791	2.39876	3.71489
ENSG00000013583	HEBP1	12	-	12974864	13000273	3.45225	10.4846
ENSG00000013588	GPRC5A	12	+	12890782	12917937	24.6287	35.2008
ENSG00000013619	MAMLD1	X	+	150361422	150514178	0.159367	0.0127982
ENSG00000013725	CD6	11	+	60971680	61020377	0.0216455	0
ENSG00000013810	TACC3	4	+	1721490	1745176	10.7073	18.8728
ENSG00000014123	UFL1	6	+	96521595	96555276	12.7128	8.34368
ENSG00000014138	POLA2	11	+	65261762	65305589	12.6885	12.0671
ENSG00000014164	ZC3H3	8	-	143437655	143541453	7.25233	7.02667
ENSG00000014216	CAPN1	11	+	65180566	65212006	52.8026	143.434
ENSG00000014257	ACPP	3	+	132317367	132368298	0	0.28592
ENSG00000014641	MDH1	2	+	63588609	63607197	20.46	27.9517
ENSG00000014824	SLC30A9	4	+	41990472	42090457	3.87273	3.20957
ENSG00000014914	MTMR11	1	-	149928651	149936898	1.28743	1.40145
ENSG00000014919	COX15	10	-	99711844	99732100	9.10933	9.68543
ENSG00000015133	CCDC88C	14	-	91271323	91417844	1.40319	0.572919
ENSG00000015153	YAF2	12	-	42157104	42238349	0.309066	0.350775
ENSG00000015171	ZMYND11	10	+	134465	254637	13.1973	11.8206
ENSG00000015285	WAS	X	+	48676596	48691427	0.23199	0.190437
ENSG00000015413	DPEP1	16	+	89613308	89638456	0	0
ENSG00000015475	BID	22	-	17734138	17774770	3.86324	6.43615
ENSG00000015479	MATR3	5	+	139293648	139331359	14.3761	6.80048
ENSG00000015520	NPC1L1	7	-	44512535	44541315	0.00103726	0.011334
ENSG00000015532	XYLT2	17	+	50346092	50363138	6.77039	4.60097
ENSG00000015568	RGPD5	2	+	109792758	109857695	5.83707	1.43872
ENSG00000015592	STMN4	8	-	27235323	27258420	0.00729534	0
ENSG00000015676	NUDCD3	7	-	44379121	44490880	7.0542	9.25664
ENSG00000016082	ISL1	5	+	51383391	51394738	0.880837	0
ENSG00000016391	CHDH	3	-	53812335	53846390	2.54773	0.066054
ENSG00000016402	IL20RA	6	-	136999971	137045180	0.121197	9.80828
ENSG00000016490	CLCA1	1	+	86468368	86500289	0	0
ENSG00000016602	CLCA4	1	+	86547078	86580754	0	4.49658
ENSG00000016864	GLT8D1	3	-	52694485	52706083	6.5249	4.11595
ENSG00000017260	ATP2C1	3	+	130850595	131016712	10.0077	10.0172
ENSG00000017427	IGF1	12	-	102395867	102480645	0	0.00421242
ENSG00000017483	SLC38A5	X	-	48458537	48470256	16.9227	0.0126637
ENSG00000017797	RALBP1	18	+	9475009	9538116	21.4005	19.69
ENSG00000018189	RUFY3	4	+	70704204	70807315	1.75616	0.798384
ENSG00000018236	CNTN1	12	+	40692442	41072418	0	0.34825
ENSG00000018280	SLC11A1	2	+	218382029	218396894	0.0447477	0.0641287
ENSG00000018408	WWTR1	3	-	149517235	149736714	1.31374	1.04213
ENSG00000018510	AGPS	2	+	177392644	177543836	11.6893	6.60504
ENSG00000018610	CXorf56	X	-	119538149	119565408	9.32276	12.1168
ENSG00000018625	ATP1A2	1	+	160115759	160143591	0.00321146	0.0121073
ENSG00000018699	TTC27	2	+	32628032	32821051	17.5633	17.7854
ENSG00000018869	ZNF582	19	-	56375846	56393545	0.319368	0.371028
ENSG00000019102	VSIG2	11	-	124747472	124752238	0.0972056	28.4948
ENSG00000019144	PHLDB1	11	+	118606440	118658038	4.0756	3.84614
ENSG00000019169	MARCO	2	+	118942166	118994660	0.537759	0.0567826
ENSG00000019186	CYP24A1	20	-	54153449	54173973	6.26266	4.5787
ENSG00000019485	PRDM11	11	+	45095806	45235124	0.764908	1.14238
ENSG00000019505	SYT13	11	-	45240301	45286319	0	0.00976431
ENSG00000019549	SNAI2	8	-	48917690	48921740	30.3984	19.3994
ENSG00000019582	CD74	5	-	150401637	150412929	4.58051	1.64441
ENSG00000019991	HGF	7	-	81699006	81770438	0.00270134	0
ENSG00000019995	ZRANB1	10	+	124942123	124988189	14.7618	5.53333
ENSG00000020129	NCDN	1	+	35557473	35567274	6.31684	7.29906
ENSG00000020181	ADGRA2	8	+	37784191	37844896	2.66204	0.225352
ENSG00000020256	ZFP64	20	-	52051663	52204308	2.50032	3.11352
ENSG00000020426	MNAT1	14	+	60734742	60969953	9.18221	5.5286
ENSG00000020577	SAMD4A	14	+	54567097	54793315	1.45997	0.924746
ENSG00000020633	RUNX3	1	-	24899511	24965121	1.33114	0.00561907
ENSG00000020922	MRE11A	11	-	94415578	94493908	7.05281	3.27028
ENSG00000021300	PLEKHB1	11	+	73646178	73662819	0.0080494	0.131101
ENSG00000021355	SERPINB1	6	-	2832332	2842006	10.0092	0.127623
ENSG00000021461	CYP3A43	7	+	99828013	99866102	0	0
ENSG00000021488	SLC7A9	19	-	32830509	32869766	0.0214588	0.0389824
ENSG00000021574	SPAST	2	+	32063611	32157637	6.1142	3.45586
ENSG00000021645	NRXN3	14	+	78170373	79868290	0.372774	0.00398655
ENSG00000021762	OSBPL5	11	-	3087116	3166739	1.85775	0.463851
ENSG00000021776	AQR	15	-	34851782	34969839	4.63527	9.29374
ENSG00000021826	CPS1	2	+	210477682	210679107	3.93077	0.0982603
ENSG00000021852	C8B	1	-	56929210	56966140	0.00562042	0
ENSG00000022267	FHL1	X	+	136146702	136211359	2.80474	1.21913
ENSG00000022277	RTFDC1	20	+	56468585	56519449	31.1299	31.4901
ENSG00000022355	GABRA1	5	+	161847191	161899981	0	0
ENSG00000022556	NLRP2	19	+	54953130	55001142	0.00399414	51.9592
ENSG00000022567	SLC45A4	8	-	141207166	141308305	1.62152	2.74031
ENSG00000022840	RNF10	12	+	120533480	120577594	25.0753	30.4079
ENSG00000022976	ZNF839	14	+	102317377	102342702	1.95045	2.81748
ENSG00000023041	ZDHHC6	10	-	112424428	112446917	5.84188	6.73085
ENSG00000023171	GRAMD1B	11	+	123454398	123627774	0.179686	0.0131931
ENSG00000023191	RNH1	11	-	494512	507300	10.8562	12.1864
ENSG00000023228	NDUFS1	2	-	206114817	206159603	17.8113	16.0973
ENSG00000023287	RB1CC1	8	-	52622456	52745843	23.8283	2.15839
ENSG00000023318	ERP44	9	-	99979179	100099040	21.5912	4.8529
ENSG00000023330	ALAS1	3	+	52198086	52214327	23.48	33.5826
ENSG00000023445	BIRC3	11	+	102317450	102339403	1.53044	0.908006
ENSG00000023516	AKAP11	13	+	42272153	42323267	15.1215	6.56582
ENSG00000023572	GLRX2	1	-	193096468	193106114	10.3218	4.00162
ENSG00000023608	SNAPC1	14	+	61762357	61796428	24.0934	2.04445
ENSG00000023697	DERA	12	+	15911172	16037282	6.39127	6.75708
ENSG00000023734	STRAP	12	+	15882391	15903478	27.9382	42.4835
ENSG00000023839	ABCC2	10	+	99782732	99852192	0.106659	1.82465
ENSG00000023892	DEF6	6	+	35297852	35321771	1.68664	14.3973
ENSG00000023902	PLEKHO1	1	+	150149183	150164720	0.318422	0.165536
ENSG00000023909	GCLM	1	-	93885205	93909456	4.96038	20.6962
ENSG00000024048	UBR2	6	+	42564062	42693504	5.52881	7.62414
ENSG00000024422	EHD2	19	+	47713343	47743134	6.27358	17.2559
ENSG00000024526	DEPDC1	1	-	68474152	68497221	15.5431	3.29581
ENSG00000024862	CCDC28A	6	+	138773509	138793319	4.97327	2.45972
ENSG00000025039	RRAGD	6	-	89364636	89412270	1.14272	0.297891
ENSG00000025156	HSF2	6	+	122399546	122433119	6.22467	1.76166
ENSG00000025293	PHF20	20	+	35771974	35950381	11.8633	5.99745
ENSG00000025423	HSD17B6	12	+	56752161	56787790	0.171881	0.29297
ENSG00000025434	NR1H3	11	+	47248300	47269032	1.66687	7.87618
ENSG00000025708	TYMP	22	-	50525752	50530056	0.110067	1.26834
ENSG00000025770	NCAPH2	22	+	50508216	50523472	23.6598	19.3374
ENSG00000025772	TOMM34	20	-	44942130	44960486	21.0088	32.2748
ENSG00000025796	SEC63	6	-	107867756	107958189	10.473	5.42294
ENSG00000025800	KPNA6	1	+	32108038	32176568	34.4289	37.349
ENSG00000026025	VIM	10	+	17228259	17237593	9.67295	0.0448973
ENSG00000026036	RTEL1-TNFRSF6B	20	+	63659300	63698684	1.30558	1.96824
ENSG00000026103	FAS	10	+	88990531	89015785	1.51474	2.16894
ENSG00000026297	RNASET2	6	-	166929504	166957191	0.770212	1.5036
ENSG00000026508	CD44	11	+	35138870	35232402	10.7913	6.71213
ENSG00000026559	KCNG1	20	-	51003656	51023129	6.70289	2.50152
ENSG00000026652	AGPAT4	6	-	161129979	161274061	0.453472	0.269084
ENSG00000026751	SLAMF7	1	+	160739057	160754821	0.0298099	1.72084
ENSG00000026950	BTN3A1	6	+	26402237	26415216	0.434377	1.31588
ENSG00000027001	MIPEP	13	-	23730189	23889419	7.41738	8.41387
ENSG00000027075	PRKCH	14	+	61187559	61550976	0.725825	7.18457
ENSG00000027644	INSRR	1	-	156840063	156859018	0.003015	0.027914
ENSG00000027697	IFNGR1	6	-	137197484	137219449	23.302	12.1456
ENSG00000027847	B4GALT7	5	+	177600100	177610347	3.19988	2.35106
ENSG00000027869	SH2D2A	1	-	156806243	156816862	0.400763	0.0714804
ENSG00000028116	VRK2	2	+	57907651	58159920	5.50125	4.63421
ENSG00000028137	TNFRSF1B	1	+	12167003	12209228	0.255252	0.430491
ENSG00000028203	VEZT	12	+	95217746	95302790	2.00333	2.67219
ENSG00000028277	POU2F2	19	-	42086110	42196585	0.145955	0.16479
ENSG00000028310	BRD9	5	-	850291	892824	4.78785	4.39554
ENSG00000028528	SNX1	15	+	64094123	64146090	9.59584	13.9452
ENSG00000028839	TBPL1	6	+	133952170	133990432	3.18614	1.66918
ENSG00000029153	ARNTL2	12	+	27332854	27425289	2.94121	2.9895
ENSG00000029363	BCLAF1	6	-	136256863	136289851	19.8404	9.07971
ENSG00000029364	SLC39A9	14	+	69398015	69462388	4.15401	9.54286
ENSG00000029534	ANK1	8	-	41653220	41896762	2.66918	0.0628019
ENSG00000029559	IBSP	4	+	87799581	87812435	0	0
ENSG00000029639	TFB1M	6	-	155257509	155314493	4.43519	5.47112
ENSG00000029725	RABEP1	17	+	5282265	5385812	9.37036	7.8401
ENSG00000029993	HMGB3	X	+	150980509	150990775	8.87105	10.9421
ENSG00000030066	NUP160	11	-	47778087	47848555	22.78	19.1071
ENSG00000030110	BAK1	6	-	33572547	33580293	3.83139	16.25
ENSG00000030304	MUSK	9	+	110668771	110801620	0.0309591	0.165922
ENSG00000030419	IKZF2	2	-	212999691	213152427	0.227602	2.12455
ENSG00000030582	GRN	17	+	44345086	44353102	59.8017	54.1305
ENSG00000031003	FAM13B	5	-	137937960	138051961	17.8274	4.06595
ENSG00000031081	ARHGAP31	3	+	119294373	119420714	0.239741	0.165624
ENSG00000031691	CENPQ	6	+	49463378	49493107	7.05863	0.837511
ENSG00000031698	SARS	1	+	109213918	109238169	45.8322	52.6272
ENSG00000031823	RANBP3	19	-	5916139	5978142	2.58063	4.40302
ENSG00000032219	ARID4A	14	+	58298385	58373887	3.88781	1.46784
ENSG00000032389	TSSC1	2	-	3188925	3377882	4.09807	6.82649
ENSG00000032444	PNPLA6	19	+	7534004	7561764	5.87446	10.0214
ENSG00000032742	IFT88	13	+	20567069	20691437	2.09691	1.28027
ENSG00000033011	ALG1	16	+	5033960	5087379	3.72334	9.00038
ENSG00000033030	ZCCHC8	12	-	122471600	122501073	5.509	2.31052
ENSG00000033050	ABCF2	7	-	151207837	151227230	24.6772	21.6686
ENSG00000033100	CHPF2	7	+	151232489	151238827	5.62241	7.32758
ENSG00000033122	LRRC7	1	+	69568398	70151945	0.0719154	0.0110474
ENSG00000033170	FUT8	14	+	65410592	65744121	5.20388	5.52111
ENSG00000033178	UBA6	4	-	67612652	67701179	6.84271	3.26969
ENSG00000033327	GAB2	11	-	78215297	78418348	2.77739	1.2435
ENSG00000033627	ATP6V0A1	17	+	42458844	42522611	2.91457	3.45423
ENSG00000033800	PIAS1	15	+	68054179	68198603	5.91504	2.60076
ENSG00000033867	SLC4A7	3	-	27372721	27484420	2.45401	1.2675
ENSG00000034053	APBA2	15	+	28884483	29118315	1.3329	0.0148007
ENSG00000034152	MAP2K3	17	+	21284672	21315240	3.56525	18.5791
ENSG00000034239	EFCAB1	8	-	48710789	48735311	0.0958262	0.0995125
ENSG00000034510	TMSB10	2	+	84905625	84906675	59.1817	35.3443
ENSG00000034533	ASTE1	3	-	131013875	131027649	0.954921	0.775448
ENSG00000034677	RNF19A	8	-	100257059	100410015	5.59533	4.18841
ENSG00000034693	PEX3	6	+	143450807	143490010	7.78541	4.78011
ENSG00000034713	GABARAPL2	16	+	75566351	75577881	6.06205	8.92659
ENSG00000034971	MYOC	1	-	171635417	171652683	0	0
ENSG00000035115	SH3YL1	2	-	217730	266398	2.07933	3.76859
ENSG00000035141	FAM136A	2	-	70295975	70302090	19.9984	8.14581
ENSG00000035403	VCL	10	+	73995193	74121363	35.5555	35.6015
ENSG00000035499	DEPDC1B	5	-	60596912	60700190	8.43115	4.1846
ENSG00000035664	DAPK2	15	-	63907036	64072033	0.670706	0.123364
ENSG00000035681	NSMAF	8	-	58583504	58659844	11.1475	14.6431
ENSG00000035687	ADSS	1	-	244408494	244452134	20.2873	6.36416
ENSG00000035720	STAP1	4	+	67558728	67607337	0.0248173	0.132014
ENSG00000035862	TIMP2	17	-	78852977	78925387	96.1343	2.1429
ENSG00000035928	RFC1	4	-	39287456	39366375	11.5657	5.85411
ENSG00000036054	TBC1D23	3	+	100261000	100325251	7.29208	4.36698
ENSG00000036257	CUL3	2	-	224470150	224585397	9.97914	1.80226
ENSG00000036448	MYOM2	8	+	2045040	2165552	0.146893	0.310662
ENSG00000036473	OTC	X	+	38352545	38421450	0	0
ENSG00000036530	CYP46A1	14	+	99684304	99727301	0.0012719	0.0044549
ENSG00000036549	ZZZ3	1	-	77562416	77683419	7.49222	4.27126
ENSG00000036565	SLC18A1	8	-	20144855	20183206	0.00475304	0
ENSG00000036672	USP2	11	-	119355215	119381726	1.42972	0.490073
ENSG00000036828	CASR	3	+	122183683	122286503	0	0.0141253
ENSG00000037042	TUBG2	17	+	42659305	42667006	4.12886	7.50534
ENSG00000037241	RPL26L1	5	+	172958729	172969771	9.04646	4.31839
ENSG00000037280	FLT4	5	-	180601506	180649624	1.28943	0.00845136
ENSG00000037474	NSUN2	5	-	6599239	6633291	36.8845	39.7328
ENSG00000037637	FBXO42	1	-	16246839	16352454	3.56843	4.76075
ENSG00000037749	MFAP3	5	+	154038906	154220478	3.8267	1.60774
ENSG00000037757	MRI1	19	+	13764532	13774282	4.08477	3.73108
ENSG00000037897	METTL1	12	-	57768471	57772793	1.70279	8.68625
ENSG00000037965	HOXC8	12	+	54009106	54012362	0.350015	0.10755
ENSG00000038002	AGA	4	-	177430770	177442503	3.18607	6.51055
ENSG00000038210	PI4K2B	4	+	25233975	25279092	5.55232	3.02713
ENSG00000038219	BOD1L1	4	-	13568738	13627723	4.40387	2.20978
ENSG00000038274	MAT2B	5	+	163503114	163519336	11.5098	12.3495
ENSG00000038295	TLL1	4	+	165873258	166103895	0.00325763	0
ENSG00000038358	EDC4	16	+	67873023	67884503	17.9068	18.9622
ENSG00000038382	TRIO	5	+	14143702	14532128	39.2771	11.6496
ENSG00000038427	VCAN	5	+	83471465	83582303	0.269704	0.0196998
ENSG00000038532	CLEC16A	16	+	10944488	11182189	6.05528	5.16356
ENSG00000038945	MSR1	8	-	16107878	16567490	0	0
ENSG00000039068	CDH1	16	+	68737225	68835548	32.3598	60.4248
ENSG00000039123	SKIV2L2	5	+	55307760	55425581	15.8667	6.78116
ENSG00000039139	DNAH5	5	-	13690331	13944543	0.271608	0.202221
ENSG00000039319	ZFYVE16	5	+	80408013	80479350	7.35398	2.86623
ENSG00000039523	FAM65A	16	+	67518418	67546788	17.4158	9.55434
ENSG00000039537	C6	5	-	41142234	41261438	0.0130003	0.00536365
ENSG00000039560	RAI14	5	+	34656237	34832627	3.58974	11.3641
ENSG00000039600	SOX30	5	-	157625679	157671480	0.0644846	0
ENSG00000039650	PNKP	19	-	49861204	49878351	6.59193	14.2731
ENSG00000039987	BEST2	19	+	12751702	12758458	0.0244544	0.0116781
ENSG00000040199	PHLPP2	16	-	71637835	71724701	3.11025	0.969212
ENSG00000040275	SPDL1	5	+	169583634	169604778	25.7473	5.53758
ENSG00000040341	STAU2	8	-	73420369	73747708	3.72131	2.54464
ENSG00000040487	PQLC2	1	+	19312326	19329300	4.36624	4.87461
ENSG00000040531	CTNS	17	+	3636468	3661542	4.88573	5.45985
ENSG00000040608	RTN4R	22	-	20241415	20283246	1.68817	0.370197
ENSG00000040633	PHF23	17	-	7235028	7239722	4.8821	6.75213
ENSG00000040731	CDH10	5	-	24487100	24644978	0.00656602	0.0138891
ENSG00000040933	INPP4A	2	+	98444854	98594390	4.52997	5.58657
ENSG00000041353	RAB27B	18	+	54717860	54895516	1.18185	1.54856
ENSG00000041357	PSMA4	15	+	78540405	78552419	26.2598	23.8619
ENSG00000041515	MYO16	13	+	108596152	109208007	0.238397	0.0509337
ENSG00000041802	LSG1	3	-	194640788	194672477	16.4136	18.7632
ENSG00000041880	PARP3	3	+	51942345	51948867	3.09418	2.55926
ENSG00000041982	TNC	9	-	115019578	115118257	20.093	0.0179162
ENSG00000041988	THAP3	1	+	6624866	6635586	1.82364	2.16364
ENSG00000042062	FAM65C	20	-	50586108	50691528	0.292285	0.411179
ENSG00000042088	TDP1	14	+	89954939	90044768	1.97561	3.72553
ENSG00000042286	AIFM2	10	-	70098223	70132934	4.04675	6.21248
ENSG00000042304	C2orf83	2	-	227610090	227633320	0	0
ENSG00000042317	SPATA7	14	+	88384924	88470350	1.11025	0.538451
ENSG00000042429	MED17	11	+	93784227	93814695	2.85164	2.47638
ENSG00000042445	RETSAT	2	-	85342088	85354620	12.4973	24.7299
ENSG00000042493	CAPG	2	-	85394748	85418432	62.8197	147.149
ENSG00000042753	AP2S1	19	-	46838136	46850992	26.7812	54.9377
ENSG00000042781	USH2A	1	-	215622894	216423396	0.0565072	0.0279
ENSG00000042813	ZPBP	7	-	49850421	50121329	0	0
ENSG00000042832	TG	8	+	132866958	133134903	0.0224152	0.0227876
ENSG00000042980	ADAM28	8	+	24294040	24359018	0	2.13892
ENSG00000043039	BARX2	11	+	129375940	129452279	1.30658	0.0756239
ENSG00000043093	DCUN1D1	3	-	182938074	182985953	3.35986	2.12484
ENSG00000043143	JADE2	5	+	134524312	134583230	5.2342	6.06874
ENSG00000043355	ZIC2	13	+	99981772	99986773	0.0217813	1.2745
ENSG00000043462	LCP2	5	-	170246237	170298227	0.00951015	0.0250048
ENSG00000043514	TRIT1	1	-	39841022	39883511	6.13761	9.76083
ENSG00000043591	ADRB1	10	+	114044056	114046908	0	0
ENSG00000044012	GUCA2B	1	+	42153421	42155824	0	0
ENSG00000044090	CUL7	6	-	43037617	43053945	2.95004	4.60697
ENSG00000044115	CTNNA1	5	+	138610967	138935034	63.2073	63.4469
ENSG00000044446	PHKA2	X	-	18892300	18984598	4.36917	3.54119
ENSG00000044459	CNTLN	9	+	17134982	17503923	1.541	0
ENSG00000044524	EPHA3	3	+	89107524	89482134	0	0.0228243
ENSG00000044574	HSPA5	9	-	125234853	125241330	117.403	100.864
ENSG00000046604	DSG2	18	+	31498043	31549008	41.5878	27.579
ENSG00000046647	GEMIN8	X	-	14008279	14029893	1.38461	2.02227
ENSG00000046651	OFD1	X	+	13734745	13769353	5.03925	3.96353
ENSG00000046653	GPM6B	X	-	13771031	13938638	0.362696	0.0443552
ENSG00000046774	MAGEC2	X	-	142202345	142205290	0	0.928405
ENSG00000046889	PREX2	8	+	67952118	68237030	0	0.00421602
ENSG00000047056	WDR37	10	+	1049538	1132297	1.61305	3.47063
ENSG00000047188	YTHDC2	5	+	113513683	113595285	7.83097	4.18945
ENSG00000047230	CTPS2	X	-	16588003	16712936	5.06499	5.80204
ENSG00000047249	ATP6V1H	8	-	53715557	53843558	6.36799	9.63803
ENSG00000047315	POLR2B	4	+	56977722	57031168	18.2607	21.2973
ENSG00000047346	FAM214A	15	-	52581317	52709817	1.49767	1.85813
ENSG00000047365	ARAP2	4	-	35948221	36244509	2.74762	2.39011
ENSG00000047410	TPR	1	-	186311652	186375693	14.6762	6.7453
ENSG00000047457	CP	3	-	149162410	149222055	0.0101344	3.1835
ENSG00000047578	KIAA0556	16	+	27550133	27780369	4.50514	6.31463
ENSG00000047579	DTNBP1	6	-	15522801	15663058	7.54815	4.11773
ENSG00000047597	XK	X	+	37685759	37732130	1.29426	1.26931
ENSG00000047617	ANO2	12	-	5531869	5946232	0.351347	0.0181902
ENSG00000047621	C12orf4	12	-	4487728	4538508	3.37213	3.06596
ENSG00000047634	SCML1	X	+	17737449	17754988	3.42071	0.788231
ENSG00000047644	WWC3	X	+	10015562	10144478	11.0843	13.1824
ENSG00000047648	ARHGAP6	X	-	11137543	11665701	0.00899073	0
ENSG00000047662	FAM184B	4	-	17629306	17781512	0.031231	0.021591
ENSG00000047849	MAP4	3	-	47850690	48089272	28.7156	8.90553
ENSG00000047932	GOPC	6	-	117560269	117602542	5.27667	6.01055
ENSG00000047936	ROS1	6	-	117288300	117425855	0	0
ENSG00000048028	USP28	11	-	113797874	113875570	9.66316	4.36619
ENSG00000048052	HDAC9	7	+	18086949	19002416	0.446864	0.0471453
ENSG00000048140	TSPAN17	5	+	176647387	176659054	16.1153	5.50413
ENSG00000048162	NOP16	5	-	176383938	176388975	5.04877	5.981
ENSG00000048342	CC2D2A	4	+	15469865	15601557	0.118715	0.492444
ENSG00000048392	RRM2B	8	-	102204502	102239118	3.84513	2.9038
ENSG00000048405	ZNF800	7	-	127346790	127431924	3.82333	1.22616
ENSG00000048462	TNFRSF17	16	+	11965107	11968068	0.371053	0.0207165
ENSG00000048471	SNX29	16	+	11976737	12574289	1.73353	4.57132
ENSG00000048540	LMO3	12	-	16548373	16610594	0.0052362	0.0682719
ENSG00000048544	MRPS10	6	-	42206801	42217865	21.5712	5.01003
ENSG00000048545	GUCA1A	6	+	42155406	42180056	0.020572	0.0117421
ENSG00000048649	RSF1	11	-	77659996	77821017	3.10201	1.6596
ENSG00000048707	VPS13D	1	+	12230067	12512047	10.3593	8.74406
ENSG00000048740	CELF2	10	+	11005321	11336675	0.136766	0.00413824
ENSG00000048828	FAM120A	9	+	93451722	93566107	41.1877	38.6034
ENSG00000048991	R3HDM1	2	+	135531455	135725270	4.50136	3.76693
ENSG00000049089	COL9A2	1	-	40300487	40317816	0.732478	0.934529
ENSG00000049130	KITLG	12	-	88492793	88580851	1.26615	3.1013
ENSG00000049167	ERCC8	5	-	60873831	60945073	1.49617	1.30153
ENSG00000049192	ADAMTS6	5	-	65148736	65481920	2.72612	0.0805079
ENSG00000049239	H6PD	1	+	9234775	9271337	15.8386	19.1621
ENSG00000049245	VAMP3	1	+	7771269	7781432	23.256	22.1041
ENSG00000049246	PER3	1	+	7784320	7845177	11.9562	0.994293
ENSG00000049247	UTS2	1	-	7843083	7853512	0.0308418	0
ENSG00000049249	TNFRSF9	1	-	7915894	7943165	0.0910126	0.0513987
ENSG00000049283	EPN3	17	+	50532543	50543750	1.04505	3.29688
ENSG00000049323	LTBP1	2	+	32946972	33399509	0.148119	5.28773
ENSG00000049449	RCN1	11	+	31812391	32105755	21.581	9.68544
ENSG00000049540	ELN	7	+	74027789	74069907	0	0
ENSG00000049541	RFC2	7	-	74231499	74254458	34.6751	36.6413
ENSG00000049618	ARID1B	6	+	156777374	157210779	3.24201	4.23572
ENSG00000049656	CLPTM1L	5	-	1317744	1345099	11.1784	23.5355
ENSG00000049759	NEDD4L	18	+	58044367	58401540	8.78119	4.88308
ENSG00000049768	FOXP3	X	-	49250436	49264826	0.101852	0.0438624
ENSG00000049769	PPP1R3F	X	+	49269843	49301461	0.840371	1.44876
ENSG00000049860	HEXB	5	+	74640023	74722647	14.8443	11.4513
ENSG00000049883	PTCD2	5	+	72320367	72368395	2.32423	2.01147
ENSG00000050030	KIAA2022	X	-	74732849	74925485	0.00204437	0.00432398
ENSG00000050130	JKAMP	14	+	59484443	59505410	1.59942	2.36196
ENSG00000050165	DKK3	11	-	11963106	12009769	5.97321	0.0171996
ENSG00000050327	ARHGEF5	7	+	144355288	144380632	12.8685	23.2131
ENSG00000050344	NFE2L3	7	+	26152240	26187125	2.49778	2.27467
ENSG00000050393	MCUR1	6	-	13786557	13814568	18.6842	3.91555
ENSG00000050405	LIMA1	12	-	50175788	50283546	30.998	38.4142
ENSG00000050426	LETMD1	12	+	51047962	51060424	1.75317	5.63255
ENSG00000050438	SLC4A8	12	+	51391317	51515763	0.103127	0.00891009
ENSG00000050555	LAMC3	9	+	131009082	131094473	1.34662	0
ENSG00000050628	PTGER3	1	-	70852353	71047808	0	0
ENSG00000050730	TNIP3	4	-	121131408	121227466	0	0
ENSG00000050748	MAPK9	5	-	180233143	180292099	9.05786	5.04062
ENSG00000050767	COL23A1	5	-	178237618	178590555	0.141727	0.0623732
ENSG00000050820	BCAR1	16	-	75228187	75268053	4.45483	10.5721
ENSG00000051009	FAM160A2	11	-	6211335	6234711	6.99501	4.28094
ENSG00000051108	HERPUD1	16	+	56932048	56944863	7.32034	15.0629
ENSG00000051128	HOMER3	19	-	18929201	18941261	24.7459	3.65274
ENSG00000051180	RAD51	15	+	40694774	40732339	9.25824	6.10893
ENSG00000051341	POLQ	3	-	121431427	121546641	7.69867	2.98326
ENSG00000051382	PIK3CB	3	-	138652699	138834938	7.0472	6.10935
ENSG00000051523	CYBA	16	-	88643283	88651152	12.677	34.9268
ENSG00000051596	THOC3	5	-	175917873	176034680	22.2603	19.2386
ENSG00000051620	HEBP2	6	+	138403531	138422197	3.98906	3.9143
ENSG00000051825	MPHOSPH9	12	-	123152320	123244014	4.22104	2.7286
ENSG00000052126	PLEKHA5	12	+	19129752	19376400	2.3224	1.86932
ENSG00000052344	PRSS8	16	-	31131433	31135762	8.34964	6.43016
ENSG00000052723	SIKE1	1	-	114769479	114780685	4.52647	0.843593
ENSG00000052749	RRP12	10	-	97356358	97426076	9.88899	14.6643
ENSG00000052795	FNIP2	4	+	158769138	158908049	0.990839	1.26253
ENSG00000052802	MSMO1	4	+	165327623	165343160	5.99341	8.60703
ENSG00000052841	TTC17	11	+	43358932	43494933	8.25578	4.30567
ENSG00000052850	ALX4	11	-	44260444	44310166	0.122074	0.058671
ENSG00000053108	FSTL4	5	-	133196455	133612564	0.143915	2.6222
ENSG00000053254	FOXN3	14	-	89124871	89619149	0.749699	1.14005
ENSG00000053328	METTL24	6	-	110245928	110358272	0.0576322	0
ENSG00000053371	AKR7A2	1	-	19303965	19312146	9.42538	28.4001
ENSG00000053372	MRTO4	1	+	19251539	19260128	17.6923	16.4788
ENSG00000053438	NNAT	20	+	37521215	37523693	4.38271	21.045
ENSG00000053501	USE1	19	+	17215346	17219829	5.42641	2.6357
ENSG00000053524	MCF2L2	3	-	183178043	183428778	0.3293	0.047746
ENSG00000053702	NRIP2	12	-	2825348	2835544	0.494616	1.26021
ENSG00000053747	LAMA3	18	+	23689443	23955066	89.8984	7.53913
ENSG00000053770	AP5M1	14	+	57268909	57298742	3.18463	3.36857
ENSG00000053900	ANAPC4	4	+	25377213	25418498	1.66389	1.11787
ENSG00000053918	KCNQ1	11	+	2444684	2849109	1.26443	0.129311
ENSG00000054116	TRAPPC3	1	-	36136570	36156053	11.6316	15.0667
ENSG00000054118	THRAP3	1	+	36224416	36305357	81.7325	62.9766
ENSG00000054148	PHPT1	9	+	136848724	136851027	16.5836	22.2659
ENSG00000054179	ENTPD2	9	-	137048098	137054045	5.15589	0.523476
ENSG00000054219	LY75	2	-	159803355	159904749	3.56576	7.49072
ENSG00000054267	ARID4B	1	-	235131634	235328219	5.01704	1.96206
ENSG00000054277	OPN3	1	-	241590102	241677376	2.70253	2.78101
ENSG00000054282	SDCCAG8	1	+	243256034	243500092	2.56413	1.45526
ENSG00000054356	PTPRN	2	-	219289623	219309648	0.020785	0
ENSG00000054392	HHAT	1	+	210328252	210676296	0.791917	0.644281
ENSG00000054523	KIF1B	1	+	10210805	10381603	6.88407	6.94157
ENSG00000054598	FOXC1	6	+	1609972	1613897	0	8.51512
ENSG00000054611	TBC1D22A	22	+	46762617	47175699	2.5014	2.94359
ENSG00000054654	SYNE2	14	+	63852983	64226433	11.9887	3.34836
ENSG00000054690	PLEKHH1	14	+	67533301	67589612	0.813464	2.45755
ENSG00000054793	ATP9A	20	-	51596514	51768634	13.6099	18.0469
ENSG00000054796	SPO11	20	+	57329759	57343994	0	0
ENSG00000054803	CBLN4	20	-	55997440	56005472	0	0
ENSG00000054938	CHRDL2	11	-	74696429	74731385	0.0449195	0.00431639
ENSG00000054965	FAM168A	11	-	73400487	73598189	4.49022	3.00285
ENSG00000054967	RELT	11	+	73376264	73397474	2.95901	2.59538
ENSG00000054983	GALC	14	-	87837820	87993665	2.97822	3.97088
ENSG00000055044	NOP58	2	+	202265716	202303666	26.3146	13.0364
ENSG00000055070	SZRD1	1	+	16352575	16398145	6.60345	19.6752
ENSG00000055118	KCNH2	7	-	150944961	150978315	0.603728	0.34494
ENSG00000055130	CUL1	7	+	148697914	148801036	19.7319	18.4532
ENSG00000055147	FAM114A2	5	-	153990128	154038936	3.92583	1.85891
ENSG00000055163	CYFIP2	5	+	157266079	157395595	2.88598	5.36873
ENSG00000055208	TAB2	6	+	149218641	149411613	20.963	12.7889
ENSG00000055211	GINM1	6	+	149566294	149591748	20.6217	3.55461
ENSG00000055332	EIF2AK2	2	-	37099210	37157065	21.066	5.07676
ENSG00000055483	USP36	17	-	78787381	78841441	8.32892	8.12306
ENSG00000055609	KMT2C	7	-	152134922	152436005	5.15095	2.29289
ENSG00000055732	MCOLN3	1	-	85018082	85048499	1.66825	0.0940545
ENSG00000055813	CCDC85A	2	+	56184123	56386173	0.35072	0.029664
ENSG00000055917	PUM2	2	-	20248691	20352234	21.0179	19.0382
ENSG00000055950	MRPL43	10	-	100969458	100987515	4.13513	4.93981
ENSG00000055955	ITIH4	3	-	52812975	52831479	0.226998	0.190748
ENSG00000055957	ITIH1	3	+	52777592	52792068	0.00558357	0
ENSG00000056050	C4orf27	4	-	169729465	169757953	7.77106	3.86501
ENSG00000056097	ZFR	5	-	32354350	32444761	43.2685	21.0845
ENSG00000056277	ZNF280C	X	-	130202711	130268899	3.17602	1.7247
ENSG00000056291	NPFFR2	4	+	72031804	72148067	0.0712093	0
ENSG00000056487	PHF21B	22	-	44881162	45009999	0.835898	0.0626995
ENSG00000056558	TRAF1	9	-	120902393	120929173	0.382994	0.230309
ENSG00000056586	RC3H2	9	-	122844556	122905341	15.1705	5.73045
ENSG00000056736	IL17RB	3	+	53846580	53865800	1.47399	0.459526
ENSG00000056972	TRAF3IP2	6	-	111556454	111606278	3.88686	3.90471
ENSG00000056998	GYG2	X	+	2828788	2882818	0.198631	0.575218
ENSG00000057019	DCBLD2	3	-	98795941	98901689	2.37859	2.4166
ENSG00000057149	SERPINB3	18	-	63637719	63661963	0.00303279	0
ENSG00000057252	SOAT1	1	+	179293714	179358680	7.22486	4.24637
ENSG00000057294	PKP2	12	-	32790745	32896840	8.54557	17.7053
ENSG00000057468	MSH4	1	+	75796882	75913238	0.068902	0.127322
ENSG00000057593	F7	13	+	113105788	113120681	0.0250137	0
ENSG00000057608	GDI2	10	-	5765223	5842132	83.1939	53.4676
ENSG00000057657	PRDM1	6	+	106086320	106109939	0.360681	1.15947
ENSG00000057663	ATG5	6	-	106184476	106325820	5.15094	5.67851
ENSG00000057704	TMCC3	12	-	94567124	94650562	1.36254	0.265764
ENSG00000057757	PITHD1	1	+	23778405	23788232	10.107	11.0515
ENSG00000057935	MTA3	2	+	42494569	42756947	3.01588	3.22822
ENSG00000058056	USP13	3	+	179652755	179789401	2.29326	1.81989
ENSG00000058063	ATP11B	3	+	182793500	182921635	8.74199	7.15153
ENSG00000058085	LAMC2	1	+	183186238	183244900	127.869	38.3562
ENSG00000058091	CDK14	7	+	90466424	91210590	2.48045	0.45982
ENSG00000058262	SEC61A1	3	+	128051641	128071683	39.2815	34.5748
ENSG00000058272	PPP1R12A	12	-	79773563	79935460	4.4308	4.24936
ENSG00000058335	RASGRF1	15	-	78959947	79090773	2.11988	0.920908
ENSG00000058404	CAMK2B	7	-	44217150	44334577	0.110853	0.00576385
ENSG00000058453	CROCC	1	+	16740273	16972979	1.85415	1.33824
ENSG00000058600	POLR3E	16	+	22297375	22335103	4.92306	5.99617
ENSG00000058668	ATP2B4	1	+	203626561	203744081	12.2173	3.69397
ENSG00000058673	ZC3H11A	1	+	203795654	203854124	15.3265	17.0179
ENSG00000058729	RIOK2	5	-	97160867	97183260	5.37305	2.34429
ENSG00000058799	YIPF1	1	-	53851719	53889834	4.42941	3.70439
ENSG00000058804	NDC1	1	-	53765460	53838860	19.4343	21.6812
ENSG00000058866	DGKG	3	-	186105668	186362237	0.00323379	0.0162143
ENSG00000059122	FLYWCH1	16	+	2911937	2951208	4.27981	6.1955
ENSG00000059145	UNKL	16	-	1363205	1414751	1.00263	1.11905
ENSG00000059377	TBXAS1	7	+	139777051	140020325	0.0397406	0.0153822
ENSG00000059378	PARP12	7	-	140023744	140063721	7.76043	2.44329
ENSG00000059573	ALDH18A1	10	-	95605929	95656706	46.6367	45.607
ENSG00000059588	TARBP1	1	-	234391313	234479103	2.1805	4.53786
ENSG00000059691	GATB	4	-	151670504	151761023	0.951754	2.14466
ENSG00000059728	MXD1	2	+	69897688	69942945	1.9523	6.80511
ENSG00000059758	CDK17	12	-	96278261	96400560	7.14251	3.621
ENSG00000059769	DNAJC25	9	+	111631352	111654351	0.728003	0.543346
ENSG00000059804	SLC2A3	12	-	7919230	7936275	4.48244	0.0290681
ENSG00000059915	PSD	10	-	102402617	102421539	0.138856	0.221222
ENSG00000060069	CTDP1	18	+	79679801	79756623	4.50878	2.85365
ENSG00000060138	YBX3	12	-	10699089	10723312	10.8452	16.3389
ENSG00000060140	STYK1	12	-	10618939	10674318	0.45722	3.24045
ENSG00000060237	WNK1	12	+	752593	911452	9.38807	23.0681
ENSG00000060339	CCAR1	10	+	68721012	68792377	9.41072	4.56606
ENSG00000060491	OGFR	20	+	62804835	62814000	10.302	12.6713
ENSG00000060558	GNA15	19	+	3136193	3163769	9.37315	17.7029
ENSG00000060566	CREB3L3	19	+	4153601	4173054	0	0
ENSG00000060642	PIGV	1	+	26787472	26798398	6.00447	5.7274
ENSG00000060656	PTPRU	1	+	29236516	29326813	16.3732	26.911
ENSG00000060688	SNRNP40	1	-	31259568	31296782	10.9506	21.3903
ENSG00000060709	RIMBP2	12	-	130396137	130716281	0.0410292	0.00358089
ENSG00000060718	COL11A1	1	-	102876467	103108496	0.00164182	0.00657701
ENSG00000060749	QSER1	11	+	32893178	32993316	13.9796	4.18567
ENSG00000060762	MPC1	6	-	166364919	166383013	7.00528	11.8383
ENSG00000060971	ACAA1	3	-	38103129	38137242	5.10821	14.1939
ENSG00000060982	BCAT1	12	-	24810022	24949459	12.9041	20.1534
ENSG00000061273	HDAC7	12	-	47782722	47833132	3.34349	11.7292
ENSG00000061337	LZTS1	8	-	20246165	20303963	0.455565	0
ENSG00000061455	PRDM6	5	+	123089121	123194266	0.0128509	0
ENSG00000061492	WNT8A	5	+	138083892	138092365	0.0134785	0
ENSG00000061656	SPAG4	20	+	35615892	35621049	1.0264	3.5744
ENSG00000061676	NCKAP1	2	-	182909115	183038858	16.6602	10.0922
ENSG00000061794	MRPS35	12	+	27710773	27756295	12.0373	49.4948
ENSG00000061918	GUCY1B3	4	+	155758992	155807591	0	0.379916
ENSG00000061936	SFSWAP	12	+	131711081	131799737	3.57245	4.64295
ENSG00000061938	TNK2	3	-	195863364	195911945	4.84205	6.64893
ENSG00000061987	MON2	12	+	62466817	62600479	2.45141	3.88746
ENSG00000062038	CDH3	16	+	68636189	68722616	27.4722	14.8566
ENSG00000062096	ARSF	X	+	3041471	3112726	0	0
ENSG00000062194	GPBP1	5	+	57173948	57264679	15.1473	7.5097
ENSG00000062282	DGAT2	11	+	75759512	75801535	0.789467	5.23383
ENSG00000062370	ZNF112	19	-	44326555	44367217	0.600662	0.885874
ENSG00000062485	CS	12	-	56271699	56300392	16.0546	40.9652
ENSG00000062524	LTK	15	-	41503638	41513887	0.0274671	0.0118774
ENSG00000062582	MRPS24	7	-	43866558	43869893	3.72849	4.70713
ENSG00000062598	ELMO2	20	-	46366049	46432985	19.1541	19.0519
ENSG00000062650	WAPL	10	-	86435256	86521815	22.7732	5.11681
ENSG00000062716	VMP1	17	+	59707192	59842255	10.5252	9.72763
ENSG00000062725	APPBP2	17	-	60443149	60526219	3.41342	3.68715
ENSG00000062822	POLD1	19	+	50384204	50418018	18.4337	27.0797
ENSG00000063015	SEZ6	17	-	28954901	29006440	0.280313	0.385559
ENSG00000063046	EIF4B	12	+	53006158	53042209	33.7915	54.1382
ENSG00000063127	SLC6A16	19	-	49289638	49325225	0.177747	0.0328838
ENSG00000063169	GLTSCR1	19	+	47608196	47703277	1.01046	1.95384
ENSG00000063176	SPHK2	19	+	48619291	48630717	1.65617	8.69201
ENSG00000063177	RPL18	19	-	48615328	48619536	105.705	183.496
ENSG00000063180	CA11	19	-	48637942	48646312	1.0854	0.75349
ENSG00000063241	ISOC2	19	-	55452985	55462343	4.46947	10.3748
ENSG00000063244	U2AF2	19	+	55654146	55674715	22.3175	53.0675
ENSG00000063245	EPN1	19	+	55675226	55709858	5.3775	8.87539
ENSG00000063322	MED29	19	+	39391303	39400637	2.86441	4.44537
ENSG00000063438	AHRR	5	+	304176	438291	1.28637	0.430134
ENSG00000063515	GSC2	22	-	19148576	19150283	0.174556	0
ENSG00000063587	ZNF275	X	+	153334155	153360110	2.11883	2.90311
ENSG00000063601	MTMR1	X	+	150692971	150765103	4.44507	13.1929
ENSG00000063660	GPC1	2	+	240435671	240468078	4.16036	51.9639
ENSG00000063761	ADCK1	14	+	77800083	77935012	1.2977	1.63082
ENSG00000063854	HAGH	16	-	1795620	1827194	3.6357	3.13245
ENSG00000063978	RNF4	4	+	2462220	2625320	4.06791	8.24257
ENSG00000064012	CASP8	2	+	201233443	201287711	3.22465	7.86145
ENSG00000064042	LIMCH1	4	+	41359607	41700044	3.01314	8.52208
ENSG00000064102	ASUN	12	-	26905181	26938326	3.60503	4.65375
ENSG00000064115	TM7SF3	12	-	26973195	27014434	4.63367	90.1966
ENSG00000064195	DLX3	17	-	49990005	49995224	0.573931	0.00936145
ENSG00000064199	SPA17	11	+	124673798	124697518	0.385793	0.406218
ENSG00000064201	TSPAN32	11	+	2301997	2318200	0.047387	0.0244799
ENSG00000064205	WISP2	20	+	44714844	44728509	0.211927	0.00153099
ENSG00000064218	DMRT3	9	+	976964	991731	0.0603732	0
ENSG00000064225	ST3GAL6	3	+	98732236	98821201	0.162341	0.0126671
ENSG00000064270	ATP2C2	16	+	84368527	84464187	3.32683	10.6176
ENSG00000064300	NGFR	17	+	49495293	49515017	0.996549	0.148803
ENSG00000064309	CDON	11	-	125955796	126063335	0.657758	0.295513
ENSG00000064313	TAF2	8	-	119730775	119832863	12.0634	9.5778
ENSG00000064393	HIPK2	7	-	139561570	139777778	1.13598	0.801985
ENSG00000064419	TNPO3	7	-	128954180	129055173	32.607	24.665
ENSG00000064489	BORCS8-MEF2B	19	-	19145567	19192158	2.24237	0.229055
ENSG00000064490	RFXANK	19	+	19192229	19201869	12.7777	6.3841
ENSG00000064545	TMEM161A	19	-	19119169	19138513	4.13789	4.60416
ENSG00000064547	LPAR2	19	-	19623668	19628930	5.30685	2.98973
ENSG00000064601	CTSA	20	+	45890144	45898820	17.7842	18.2914
ENSG00000064607	SUGP2	19	-	18990888	19034023	12.5552	8.03854
ENSG00000064651	SLC12A2	5	+	128083766	128189688	3.17173	11.4446
ENSG00000064652	SNX24	5	+	122843439	123029354	8.64678	2.06891
ENSG00000064655	EYA2	20	+	46894624	47188844	0.390232	0.46945
ENSG00000064666	CNN2	19	+	1026581	1039068	40.9282	21.8059
ENSG00000064687	ABCA7	19	+	1040101	1065572	1.81213	3.90547
ENSG00000064692	SNCAIP	5	+	122311354	122464219	0	0.389191
ENSG00000064703	DDX20	1	+	111755245	111768016	4.89348	3.1313
ENSG00000064726	BTBD1	15	-	83016422	83067354	21.3777	14.1128
ENSG00000064763	FAR2	12	+	29149103	29340980	0.288105	2.33289
ENSG00000064787	BCAS1	20	-	53936777	54070594	0.0100404	7.0741
ENSG00000064835	POU1F1	3	-	87259404	87276587	0.0470458	0.0359598
ENSG00000064886	CHI3L2	1	+	111200771	111243440	0.109558	0.457745
ENSG00000064932	SBNO2	19	-	1107636	1174283	6.71986	11.834
ENSG00000064933	PMS1	2	+	189784085	189877629	4.07104	1.15976
ENSG00000064961	HMG20B	19	+	3572777	3579088	3.48693	4.56372
ENSG00000064989	CALCRL	2	-	187343129	187448460	0	0
ENSG00000064995	TAF11	6	-	34877778	34888089	3.47732	3.84572
ENSG00000064999	ANKS1A	6	+	34889265	35091413	2.66167	9.2685
ENSG00000065000	AP3D1	19	-	2100988	2164465	16.7018	20.5917
ENSG00000065029	ZNF76	6	+	35258909	35295985	3.16676	6.36643
ENSG00000065054	SLC9A3R2	16	+	2025356	2039026	4.29985	1.74377
ENSG00000065057	NTHL1	16	-	2039815	2047866	1.52215	4.97054
ENSG00000065060	UHRF1BP1	6	+	34792015	34883138	16.8039	14.837
ENSG00000065135	GNAI3	1	+	109548611	109618321	5.98892	2.75197
ENSG00000065150	IPO5	13	+	97953658	98024297	34.1979	30.8184
ENSG00000065154	OAT	10	-	124397303	124418976	13.8476	14.1477
ENSG00000065183	WDR3	1	+	117929720	117966542	6.83237	7.83832
ENSG00000065243	PKN2	1	+	88684222	88836255	17.2252	12.0125
ENSG00000065268	WDR18	19	+	984271	998438	2.4307	9.24475
ENSG00000065308	TRAM2	6	-	52497402	52576915	16.3381	6.43396
ENSG00000065320	NTN1	17	+	9021542	9244000	1.24143	0.462365
ENSG00000065325	GLP2R	17	+	9822206	9892102	0.31101	0.0218077
ENSG00000065328	MCM10	10	+	13161554	13211104	13.1014	6.64989
ENSG00000065357	DGKA	12	+	55927319	55954027	2.37155	10.2239
ENSG00000065361	ERBB3	12	+	56079857	56103505	7.26404	11.8843
ENSG00000065371	ROPN1	3	-	123968521	123992178	0.0106381	0.0111296
ENSG00000065413	ANKRD44	2	-	196967017	197311173	0.123258	0.284353
ENSG00000065427	KARS	16	-	75627474	75648643	40.7794	48.0282
ENSG00000065457	ADAT1	16	-	75596981	75623300	6.07798	9.28949
ENSG00000065485	PDIA5	3	+	123067062	123225227	2.2371	3.5881
ENSG00000065491	TBC1D22B	6	+	37257772	37332970	3.18742	4.4535
ENSG00000065518	NDUFB4	3	+	120596309	120602500	2.13467	4.1261
ENSG00000065526	SPEN	1	+	15847864	15940460	13.8253	17.8043
ENSG00000065534	MYLK	3	-	123610049	123884331	1.20833	0.281682
ENSG00000065548	ZC3H15	2	+	186486156	186509363	23.404	12.4668
ENSG00000065559	MAP2K4	17	+	12020824	12143830	4.31292	8.16195
ENSG00000065600	TMEM206	1	-	212363931	212414901	4.70921	5.97008
ENSG00000065609	SNAP91	6	-	83552880	83709691	0	0.20588
ENSG00000065613	SLK	10	+	103967201	104029233	11.6839	3.53697
ENSG00000065615	CYB5R4	6	+	83859643	83967424	3.46306	1.26801
ENSG00000065618	COL17A1	10	-	104031286	104086002	4.65704	3.96754
ENSG00000065621	GSTO2	10	+	104268873	104304945	2.26943	0.03591
ENSG00000065665	SEC61A2	10	+	12129637	12169961	5.67723	1.87467
ENSG00000065675	PRKCQ	10	-	6427143	6580301	3.35386	2.64209
ENSG00000065717	TLE2	19	-	2997638	3047635	4.58213	4.26692
ENSG00000065802	ASB1	2	+	238426742	238452250	4.50182	5.06092
ENSG00000065809	FAM107B	10	-	14518557	14774897	7.89037	2.13293
ENSG00000065833	ME1	6	-	83210389	83431071	5.86763	28.1882
ENSG00000065882	TBC1D1	4	+	37891087	38139175	4.28909	8.73231
ENSG00000065883	CDK13	7	+	39950037	40097134	4.17296	3.52422
ENSG00000065911	MTHFD2	2	+	74198562	74217565	66.0916	70.9903
ENSG00000065923	SLC9A7	X	-	46599252	46759172	4.47428	5.31317
ENSG00000065970	FOXJ2	12	+	8032703	8055503	7.69656	4.54534
ENSG00000065978	YBX1	1	+	42682427	42702349	52.4386	54.6016
ENSG00000065989	PDE4A	19	+	10416773	10469631	0.12493	1.00037
ENSG00000066027	PPP2R5A	1	+	212285537	212361863	9.73302	5.11874
ENSG00000066032	CTNNA2	2	+	79185231	80648861	0	0.00892622
ENSG00000066044	ELAVL1	19	-	7958579	8445041	14.7424	18.7537
ENSG00000066056	TIE1	1	+	43300993	43323108	0.0173246	0
ENSG00000066084	DIP2B	12	+	50504985	50748667	10.5335	14.2302
ENSG00000066117	SMARCD1	12	+	50084972	50100712	6.06626	19.3428
ENSG00000066135	KDM4A	1	+	43650158	43705515	25.4189	35.7822
ENSG00000066136	NFYC	1	+	40691570	40771603	5.51999	7.48156
ENSG00000066185	ZMYND12	1	-	42430329	42456267	0.491775	0.0536616
ENSG00000066230	SLC9A3	5	-	473310	524332	0.0338822	0
ENSG00000066248	NGEF	2	-	232878686	233013272	1.45273	0.650126
ENSG00000066279	ASPM	1	-	197084128	197146694	21.0389	3.62062
ENSG00000066294	CD84	1	-	160541095	160579516	0	0
ENSG00000066322	ELOVL1	1	-	43363397	43368074	13.3184	43.1623
ENSG00000066336	SPI1	11	-	47354860	47378576	0.0115766	0.0708602
ENSG00000066379	ZNRD1	6	+	30058899	30064909	5.00647	6.40426
ENSG00000066382	MPPED2	11	-	30384493	30586872	0	0.194896
ENSG00000066405	CLDN18	3	+	137998735	138033655	0.0788725	0.123177
ENSG00000066422	ZBTB11	3	-	101648889	101677495	14.0796	3.41973
ENSG00000066427	ATXN3	14	-	92038652	92106621	1.44759	0.321664
ENSG00000066455	GOLGA5	14	+	92794231	92839963	14.5892	11.2702
ENSG00000066468	FGFR2	10	-	121478334	121598458	12.227	2.04367
ENSG00000066557	LRRC40	1	-	70144805	70205620	14.7776	2.82488
ENSG00000066583	ISOC1	5	+	129094751	129114028	7.19426	19.3159
ENSG00000066629	EML1	14	+	99737693	99942060	0.0617393	0.814653
ENSG00000066651	TRMT11	6	+	125986430	126039276	3.84384	2.8569
ENSG00000066654	THUMPD1	16	-	20733664	20742084	9.28751	3.68891
ENSG00000066697	MSANTD3	9	+	100427156	100451711	3.50482	1.79521
ENSG00000066735	KIF26A	14	+	104138723	104180894	4.31299	0.00752393
ENSG00000066739	ATG2B	14	-	96279202	96363870	5.93337	3.49744
ENSG00000066777	ARFGEF1	8	-	67173511	67343677	14.6838	11.8336
ENSG00000066813	ACSM2B	16	-	20536226	20576427	0	0
ENSG00000066827	ZFAT	8	-	134477788	134713049	2.24908	2.46547
ENSG00000066855	MTFR1	8	+	65644734	65771261	10.1535	7.25104
ENSG00000066923	STAG3	7	+	100177563	100221488	0.258668	0.116588
ENSG00000066926	FECH	18	-	57548283	57586772	8.03016	15.4245
ENSG00000066933	MYO9A	15	-	71822289	72118577	4.19436	1.04498
ENSG00000067048	DDX3Y	Y	+	12904108	12920478	5.15888	0
ENSG00000067057	PFKP	10	+	3066333	3137712	40.2105	40.1947
ENSG00000067064	IDI1	10	-	1039908	1049170	5.38278	4.12494
ENSG00000067066	SP100	2	+	230415942	230544090	3.69904	2.80962
ENSG00000067082	KLF6	10	-	3775996	3785281	34.2316	3.27418
ENSG00000067113	PLPP1	5	-	55424854	55535050	3.83525	13.963
ENSG00000067141	NEO1	15	+	73051710	73305206	9.05619	0.747945
ENSG00000067167	TRAM1	8	-	70573442	70608387	23.0817	8.92977
ENSG00000067177	PHKA1	X	-	72578814	72714319	3.03377	5.57875
ENSG00000067182	TNFRSF1A	12	-	6328757	6342114	6.41828	21.4133
ENSG00000067191	CACNB1	17	-	39173456	39197703	1.94103	1.15254
ENSG00000067208	EVI5	1	-	92508696	92792404	3.01822	1.48433
ENSG00000067221	STOML1	15	-	73978923	73994622	0.989194	1.04749
ENSG00000067225	PKM	15	-	72199029	72231822	95.6572	358.324
ENSG00000067248	DHX29	5	-	55256245	55307722	12.2903	7.90693
ENSG00000067334	DNTTIP2	1	-	93866283	93879918	6.4475	1.54244
ENSG00000067365	METTL22	16	+	8621683	8649654	1.23263	1.49615
ENSG00000067369	TP53BP1	15	-	43403061	43510728	7.6144	11.8767
ENSG00000067445	TRO	X	+	54920462	54931431	0.0457215	0.00378416
ENSG00000067533	RRP15	1	+	218285287	218337983	0.960987	1.53378
ENSG00000067560	RHOA	3	-	49359145	49412998	201.577	115.213
ENSG00000067596	DHX8	17	+	43483865	43544463	9.24872	20.3775
ENSG00000067601	PMS2P4	7	-	67295608	67302907	1.24634	1.46234
ENSG00000067606	PRKCZ	1	+	2050470	2185395	7.62599	5.92002
ENSG00000067646	ZFY	Y	+	2935281	2982506	5.75084	0.0091974
ENSG00000067704	IARS2	1	+	220094102	220148041	42.3236	45.3033
ENSG00000067715	SYT1	12	+	78863993	79452008	0.0882793	0.41727
ENSG00000067798	NAV3	12	+	77830905	78213008	0.00215475	0.0051575
ENSG00000067829	IDH3G	X	-	153785766	153794523	4.93951	7.47962
ENSG00000067836	ROGDI	16	-	4796968	4802950	1.36447	3.84768
ENSG00000067840	PDZD4	X	-	153802166	153830565	2.56336	0.079465
ENSG00000067842	ATP2B3	X	+	153517676	153582939	0.0603666	0.0276222
ENSG00000067900	ROCK1	18	-	20946906	21111851	10.2446	3.79227
ENSG00000067955	CBFB	16	+	67029116	67101058	12.9997	8.435
ENSG00000067992	PDK3	X	+	24465221	24539837	2.94381	4.10442
ENSG00000068001	HYAL2	3	-	50317790	50322906	4.94132	0
ENSG00000068024	HDAC4	2	-	239048168	239401654	1.311	1.72505
ENSG00000068028	RASSF1	3	-	50329782	50340980	19.819	0.00335833
ENSG00000068078	FGFR3	4	+	1793307	1808872	1.00304	16.6801
ENSG00000068079	IFI35	17	+	43006725	43014456	7.0378	6.92164
ENSG00000068097	HEATR6	17	-	60043194	60078931	7.77908	7.21024
ENSG00000068120	COASY	17	+	42561467	42566277	18.5032	41.5088
ENSG00000068137	PLEKHH3	17	-	42667914	42676994	1.25725	9.40856
ENSG00000068305	MEF2A	15	+	99565417	99716466	3.31131	2.50236
ENSG00000068308	OTUD5	X	-	48922028	48958386	9.93944	9.6033
ENSG00000068323	TFE3	X	-	49028726	49043486	15.3823	5.90494
ENSG00000068354	TBC1D25	X	+	48539457	48562609	2.0922	1.82466
ENSG00000068366	ACSL4	X	-	109624244	109733403	8.41189	3.54746
ENSG00000068383	INPP5A	10	+	132537820	132783480	11.0008	8.2422
ENSG00000068394	GPKOW	X	-	49113389	49123801	9.20434	20.809
ENSG00000068400	GRIPAP1	X	-	48973720	49002264	3.99955	5.41942
ENSG00000068438	FTSJ1	X	+	48476021	48486364	31.9368	18.1906
ENSG00000068489	PRR11	17	+	59155499	59204705	15.0485	9.57767
ENSG00000068615	REEP1	2	-	86213993	86338083	0.781918	0.0398343
ENSG00000068650	ATP11A	13	+	112690329	112887168	11.2391	6.8766
ENSG00000068654	POLR1A	2	-	86020216	86106155	17.7515	20.471
ENSG00000068697	LAPTM4A	2	-	20032650	20052028	117.026	48.0996
ENSG00000068724	TTC7A	2	+	46916157	47076137	10.0449	8.42311
ENSG00000068745	IP6K2	3	-	48688003	48740353	4.73891	6.05143
ENSG00000068781	STON1-GTF2A1L	2	+	48529925	48776517	0	0
ENSG00000068784	SRBD1	2	-	45388680	45612165	4.34668	3.72697
ENSG00000068796	KIF2A	5	+	62306162	62537249	16.9114	11.9991
ENSG00000068831	RASGRP2	11	-	64726911	64745456	0.0810741	0
ENSG00000068878	PSME4	2	-	53864067	53970840	13.5765	19.8994
ENSG00000068885	IFT80	3	-	160256986	160399880	2.24973	1.07401
ENSG00000068903	SIRT2	19	-	38878555	38899862	2.929	9.81435
ENSG00000068912	ERLEC1	2	+	53787044	53818819	15.1633	13.6005
ENSG00000068971	PPP2R5B	11	+	64917553	64934473	5.1601	3.02156
ENSG00000068976	PYGM	11	-	64746389	64760297	0.106846	0.0153082
ENSG00000068985	PAGE1	X	-	49687450	49695993	0	0
ENSG00000069011	PITX1	5	-	135027735	135034813	1.93284	1.73944
ENSG00000069018	TRPC7	5	-	136213320	136365537	0.00796942	0
ENSG00000069020	MAST4	5	+	66596361	67169595	2.75527	9.62078
ENSG00000069122	ADGRF5	6	-	46852512	46954943	0	0.0782371
ENSG00000069188	SDK2	17	-	73334384	73644089	0.10787	0.00656942
ENSG00000069206	ADAM7	8	+	24440930	24526970	0	0
ENSG00000069248	NUP133	1	-	229440260	229508341	17.9024	19.0183
ENSG00000069275	NUCKS1	1	-	205712819	205750276	22.0559	50.8146
ENSG00000069329	VPS35	16	-	46656132	46689518	6.26927	3.83326
ENSG00000069345	DNAJA2	16	-	46955362	46973788	23.7129	21.3671
ENSG00000069399	BCL3	19	+	44747705	44760044	2.87518	6.89535
ENSG00000069424	KCNAB2	1	+	5991466	6101193	1.21685	0.94418
ENSG00000069431	ABCC9	12	-	21797401	21941402	0	0
ENSG00000069482	GAL	11	+	68683779	68691175	2.10373	0.0586531
ENSG00000069493	CLEC2D	12	+	9664969	9699555	0.0926402	0.237166
ENSG00000069509	FUNDC1	X	-	44523639	44543001	3.12561	8.26703
ENSG00000069535	MAOB	X	-	43766611	43882447	0.123166	0
ENSG00000069667	RORA	15	-	60488284	61229319	0.25181	0.106393
ENSG00000069696	DRD4	11	+	637293	640706	0.284689	0.259208
ENSG00000069702	TGFBR3	1	-	91680343	91906335	5.56264	15.1407
ENSG00000069712	KIAA1107	1	+	92167052	92184723	1.03019	0.54242
ENSG00000069764	PLA2G10	16	-	14672545	14694669	0.115873	0.628713
ENSG00000069812	HES2	1	-	6412418	6424670	3.81188	0.210927
ENSG00000069849	ATP1B3	3	+	141876124	141926514	9.23964	45.5932
ENSG00000069869	NEDD4	15	-	55826922	55993746	16.0002	7.74891
ENSG00000069943	PIGB	15	+	55318960	55355648	2.19367	2.37969
ENSG00000069956	MAPK6	15	+	51952106	52067372	14.8081	15.3156
ENSG00000069966	GNB5	15	-	52115105	52191369	1.3753	3.11327
ENSG00000069974	RAB27A	15	-	55202966	55319113	1.86668	1.64414
ENSG00000069998	CECR5	22	-	17137511	17165287	6.18614	8.86944
ENSG00000070010	UFD1L	22	-	19449910	19479215	6.44092	6.89122
ENSG00000070018	LRP6	12	-	12116025	12267012	4.44177	4.78595
ENSG00000070019	GUCY2C	12	-	14612632	14696585	0.0121339	0.26283
ENSG00000070031	SCT	11	-	626431	627143	0.225199	0.422819
ENSG00000070047	PHRF1	11	+	576486	612222	11.5995	7.11019
ENSG00000070061	IKBKAP	9	-	108867517	108934116	16.872	12.7348
ENSG00000070081	NUCB2	11	+	17208153	17349974	1.59098	0.293425
ENSG00000070087	PFN2	3	-	149964904	150050788	12.7168	10.3866
ENSG00000070159	PTPN3	9	-	109375466	109498313	3.85462	8.73318
ENSG00000070182	SPTB	14	-	64746283	64879883	1.01989	0.140725
ENSG00000070190	DAPP1	4	+	99816833	99870154	1.25938	1.55953
ENSG00000070193	FGF10	5	-	44303544	44389706	0	0
ENSG00000070214	SLC44A1	9	+	105244622	105439171	7.94678	11.0514
ENSG00000070269	TMEM260	14	+	56488354	56650606	0.877906	1.23302
ENSG00000070366	SMG6	17	-	2059839	2303771	8.68657	6.99568
ENSG00000070367	EXOC5	14	-	57200507	57269008	5.6093	1.12845
ENSG00000070371	CLTCL1	22	-	19179473	19291716	2.82865	1.19161
ENSG00000070388	FGF22	19	+	639879	644371	0.0478777	0.0521542
ENSG00000070404	FSTL3	19	+	676365	683399	7.71898	1.55116
ENSG00000070413	DGCR2	22	-	19036282	19122454	10.3293	16.204
ENSG00000070423	RNF126	19	-	647526	663277	2.35363	6.68756
ENSG00000070444	MNT	17	-	2384060	2401118	1.98206	0.842312
ENSG00000070476	ZXDC	3	-	126437601	126475919	4.83144	6.68946
ENSG00000070495	JMJD6	17	-	76712832	76726799	2.05465	2.91641
ENSG00000070501	POLB	8	+	42338454	42371808	5.23976	7.44475
ENSG00000070526	ST6GALNAC1	17	-	76624761	76643838	0	0
ENSG00000070540	WIPI1	17	-	68420948	68457513	4.28085	4.88421
ENSG00000070601	FRMPD1	9	+	37651000	37746904	0.0337382	0
ENSG00000070610	GBA2	9	-	35736866	35749228	8.4815	4.07522
ENSG00000070614	NDST1	5	+	150485818	150558211	59.1295	30.06
ENSG00000070669	ASNS	7	-	97852118	97872542	99.2231	54.8073
ENSG00000070718	AP3M2	8	+	42152946	42171673	9.59227	8.86059
ENSG00000070729	CNGB1	16	-	57882340	57971116	0.0189072	0.176016
ENSG00000070731	ST6GALNAC2	17	-	76563710	76586956	1.22252	3.19286
ENSG00000070748	CHAT	10	+	49609095	49665104	0.00802644	0
ENSG00000070756	PABPC1	8	-	100685816	100722809	246.093	163.111
ENSG00000070759	TESK2	1	-	45343883	45491166	1.28475	1.68013
ENSG00000070761	CFAP20	16	-	58113588	58129450	14.7515	24.7981
ENSG00000070770	CSNK2A2	16	-	58157907	58197920	39.6773	29.4077
ENSG00000070778	PTPN21	14	-	88465778	88554733	5.076	2.67001
ENSG00000070785	EIF2B3	1	-	44850522	44986722	5.92573	9.23525
ENSG00000070808	CAMK2A	5	-	150219491	150290291	0.15221	0.0081829
ENSG00000070814	TCOF1	5	+	150357639	150400308	28.322	12.4054
ENSG00000070831	CDC42	1	+	22052627	22092946	62.001	59.3985
ENSG00000070882	OSBPL3	7	-	24796539	24981634	4.71215	7.55979
ENSG00000070886	EPHA8	1	+	22563564	22603594	0.0179412	0.00711559
ENSG00000070915	SLC12A3	16	+	56865207	56915850	0	0.00411309
ENSG00000070950	RAD18	3	-	8775402	8963773	6.45896	1.82454
ENSG00000070961	ATP2B1	12	-	89588049	89709300	6.13766	4.1708
ENSG00000070985	TRPM5	11	-	2404515	2423045	0.00783321	0.0110125
ENSG00000071051	NCK2	2	+	105744897	105894274	7.38924	7.23446
ENSG00000071054	MAP4K4	2	+	101696850	101894689	28.8248	8.60086
ENSG00000071073	MGAT4A	2	-	98619106	98731126	4.12261	1.0357
ENSG00000071082	RPL31	2	+	101001715	101024032	9.59235	8.11687
ENSG00000071127	WDR1	4	-	10074339	10116949	24.5392	38.4998
ENSG00000071189	SNX13	7	-	17790761	17940501	2.46519	2.08865
ENSG00000071203	MS4A12	11	+	60492778	60507430	0.00230862	0
ENSG00000071205	ARHGAP10	4	+	147732063	148072780	3.02519	3.10763
ENSG00000071242	RPS6KA2	6	-	166409364	166906451	1.59278	1.73171
ENSG00000071243	ING3	7	+	120950749	120977216	4.6107	0.933082
ENSG00000071246	VASH1	14	+	76762189	76783015	0.818847	0.335592
ENSG00000071282	LMCD1	3	+	8501707	8574673	0.566201	0.106496
ENSG00000071462	WBSCR22	7	+	73683025	73705161	8.98908	11.8966
ENSG00000071537	SEL1L	14	-	81471549	81533861	15.4848	6.83057
ENSG00000071539	TRIP13	5	+	892643	919357	28.2583	12.1918
ENSG00000071553	ATP6AP1	X	+	154428632	154436516	18.1649	24.6426
ENSG00000071564	TCF3	19	-	1609290	1652605	5.60267	3.52624
ENSG00000071575	TRIB2	2	+	12716889	12742734	0.107135	5.33061
ENSG00000071626	DAZAP1	19	+	1407569	1435687	6.77975	8.99975
ENSG00000071655	MBD3	19	-	1573596	1592801	3.92676	8.05165
ENSG00000071677	PRLH	2	+	237566574	237567175	0	0.038664
ENSG00000071794	HLTF	3	-	149030127	149086554	13.4796	6.05162
ENSG00000071859	FAM50A	X	+	154444126	154450654	19.0428	12.3422
ENSG00000071889	FAM3A	X	-	154506159	154516242	3.21807	4.63346
ENSG00000071894	CPSF1	8	-	144393229	144409349	19.2787	23.8652
ENSG00000071909	MYO3B	2	+	170178145	170655171	0.000517522	2.88341
ENSG00000071967	CYBRD1	2	+	171522247	171558133	3.81742	0.804379
ENSG00000071991	CDH19	18	-	66501083	66604138	0	0
ENSG00000071994	PDCD2	6	-	170575295	170584692	6.78317	6.69359
ENSG00000072041	SLC6A15	12	-	84859488	84913615	0.0922674	0
ENSG00000072042	RDH11	14	-	67676801	67695814	6.6917	21.6118
ENSG00000072062	PRKACA	19	-	14091688	14118084	12.9399	5.32116
ENSG00000072071	ADGRL1	19	-	14147743	14206187	6.19776	2.87383
ENSG00000072080	SPP2	2	+	234050679	234077134	0	0
ENSG00000072110	ACTN1	14	-	68874143	68979440	52.7406	32.1704
ENSG00000072121	ZFYVE26	14	-	67727374	67816590	5.87405	4.70678
ENSG00000072133	RPS6KA6	X	-	84058346	84187907	0.532678	0.421959
ENSG00000072134	EPN2	17	+	19215615	19336715	3.6122	3.80446
ENSG00000072135	PTPN18	2	+	130356007	130375409	3.77714	3.37191
ENSG00000072163	LIMS2	2	-	127638381	127681786	2.69083	0
ENSG00000072182	ASIC4	2	+	219514170	219538772	0.058604	0
ENSG00000072195	SPEG	2	+	219434846	219498287	1.54866	0.0848639
ENSG00000072201	LNX1	4	-	53459301	53701405	0.191804	1.17706
ENSG00000072210	ALDH3A2	17	+	19648136	19677598	2.02963	12.4803
ENSG00000072274	TFRC	3	-	196027183	196082189	20.4435	47.5186
ENSG00000072310	SREBF1	17	-	17810399	17837002	6.42446	44.1237
ENSG00000072315	TRPC5	X	-	111774315	112082776	0.001756	0.03074
ENSG00000072364	AFF4	5	-	132875379	132963634	24.4787	11.762
ENSG00000072401	UBE2D1	10	+	58334975	58370753	2.74307	1.39579
ENSG00000072415	MPP5	14	+	67241109	67335819	4.88787	3.5477
ENSG00000072422	RHOBTB1	10	-	60869438	61001440	0.0520914	0.0702272
ENSG00000072501	SMC1A	X	-	53374149	53422728	16.0795	25.9414
ENSG00000072506	HSD17B10	X	-	53431258	53434373	60.7042	91.9638
ENSG00000072518	MARK2	11	+	63838928	63911019	13.8563	15.2776
ENSG00000072571	HMMR	5	+	163460203	163491945	45.544	5.38954
ENSG00000072609	CHFR	12	-	132822187	132956304	2.71692	3.01832
ENSG00000072657	TRHDE	12	+	72087266	72670757	0.0802855	0.00212684
ENSG00000072682	P4HA2	5	-	132191838	132295315	9.38548	2.99562
ENSG00000072694	FCGR2B	1	+	161663147	161678654	0	0.00955351
ENSG00000072736	NFATC3	16	+	68084751	68229259	8.46592	7.13399
ENSG00000072756	TRNT1	3	+	3126916	3150879	6.94519	1.32225
ENSG00000072778	ACADVL	17	+	7217125	7225273	33.5032	48.2914
ENSG00000072786	STK10	5	-	172042073	172188386	17.0929	9.0864
ENSG00000072803	FBXW11	5	-	171861549	172006873	19.883	14.6534
ENSG00000072818	ACAP1	17	+	7336529	7351478	0.431784	0.0893193
ENSG00000072832	CRMP1	4	-	5748084	5893058	1.05928	0.199227
ENSG00000072840	EVC	4	+	5711197	5814305	3.24237	0.765902
ENSG00000072849	DERL2	17	-	5471251	5486811	6.23209	2.88422
ENSG00000072858	SIDT1	3	+	113532296	113629578	0.00624173	1.78064
ENSG00000072864	NDE1	16	+	15643267	15726353	3.81574	4.62436
ENSG00000072952	MRVI1	11	-	10573091	10693988	0.0690927	0.0233246
ENSG00000072954	TMEM38A	19	+	16661127	16690029	5.65053	1.06547
ENSG00000072958	AP1M1	19	+	16197578	16245907	4.0534	2.17907
ENSG00000073008	PVR	19	+	44643798	44663583	10.8192	18.3224
ENSG00000073050	XRCC1	19	-	43543040	43580473	8.02081	15.2087
ENSG00000073060	SCARB1	12	-	124776856	124882668	5.47448	6.80649
ENSG00000073067	CYP2W1	7	+	983199	989640	0.260189	0.0782729
ENSG00000073111	MCM2	3	+	127598223	127622436	52.8487	47.8597
ENSG00000073146	MOV10L1	22	+	50089879	50161690	0.0719032	0.0173808
ENSG00000073150	PANX2	22	+	50170731	50180294	1.97485	4.29359
ENSG00000073169	SELO	22	+	50200979	50217616	6.02117	14.1452
ENSG00000073282	TP63	3	+	189631416	189897279	0.0814768	18.2465
ENSG00000073331	ALPK1	4	+	112285509	112442620	0.272096	0.842069
ENSG00000073350	LLGL2	17	+	75525080	75575208	7.54696	10.8614
ENSG00000073417	PDE8A	15	+	84980440	85139145	7.18962	7.57455
ENSG00000073464	CLCN4	X	+	10156945	10237660	0.673867	2.37232
ENSG00000073536	NLE1	17	-	35128753	35142315	3.54604	9.26946
ENSG00000073578	SDHA	5	+	218241	256700	15.103	25.8005
ENSG00000073584	SMARCE1	17	-	40624962	40648508	5.24422	3.5937
ENSG00000073598	FNDC8	17	+	35121579	35130732	0.019433	0.020692
ENSG00000073605	GSDMB	17	-	39904595	39919854	0.928346	3.50027
ENSG00000073614	KDM5A	12	-	280129	389454	5.12461	8.54484
ENSG00000073670	ADAM11	17	+	44759031	44781846	0.0720653	0.136928
ENSG00000073711	PPP2R3A	3	+	135965673	136147891	16.9238	0.948505
ENSG00000073712	FERMT2	14	-	52857268	52952435	8.10337	2.0431
ENSG00000073734	ABCB11	2	-	168922938	169031322	0	0.143765
ENSG00000073737	DHRS9	2	+	169064789	169096167	0.000747635	0.208979
ENSG00000073754	CD5L	1	-	157830914	157898256	0	0
ENSG00000073756	PTGS2	1	-	186671791	186680427	0.740539	39.7188
ENSG00000073792	IGF2BP2	3	-	185643739	185825056	14.3347	1.1002
ENSG00000073803	MAP3K13	3	+	185282941	185489097	1.03582	0.678387
ENSG00000073849	ST6GAL1	3	+	186930485	187078553	1.22182	0.159427
ENSG00000073861	TBX21	17	+	47733244	47746119	0.0134533	0
ENSG00000073910	FRY	13	+	32031300	32299122	1.13804	9.08651
ENSG00000073921	PICALM	11	-	85957684	86069882	31.2567	22.1959
ENSG00000073969	NSF	17	+	46590669	46757464	6.10188	15.7875
ENSG00000074047	GLI2	2	+	120735623	120992653	0.599517	0
ENSG00000074054	CLASP1	2	-	121337776	121649587	15.5542	11.1121
ENSG00000074071	MRPS34	16	-	1771890	1773155	4.49771	51.2336
ENSG00000074181	NOTCH3	19	-	15159038	15200981	4.30169	6.74972
ENSG00000074201	CLNS1A	11	-	77514936	77637805	11.5585	9.86597
ENSG00000074211	PPP2R2C	4	-	6320578	6563600	0.431907	0.141664
ENSG00000074219	TEAD2	19	-	49340595	49362457	3.20786	0.1368
ENSG00000074266	EED	11	+	86244544	86278813	2.51101	2.85362
ENSG00000074276	CDHR2	5	+	176542511	176595974	1.25321	0.218043
ENSG00000074317	SNCB	5	-	176620084	176630556	0.0508751	0.0126704
ENSG00000074319	TSG101	11	-	18468336	18527232	14.8036	10.5471
ENSG00000074356	NCBP3	17	-	3802165	3846251	4.22576	3.81981
ENSG00000074370	ATP2A3	17	-	3923870	3964464	0.840638	1.14112
ENSG00000074410	CA12	15	-	63321378	63382161	0.093295	0.0720829
ENSG00000074416	MGLL	3	-	127689062	127823250	3.24513	1.02448
ENSG00000074527	NTN4	12	-	95657807	95791152	18.7563	20.2104
ENSG00000074582	BCS1L	2	+	218658764	218663443	5.87848	9.15469
ENSG00000074590	NUAK1	12	-	106063340	106140033	43.8165	3.08871
ENSG00000074603	DPP8	15	-	65442463	65517704	6.40457	4.13138
ENSG00000074621	SLC24A1	15	+	65611366	65660995	1.28297	1.69162
ENSG00000074657	ZNF532	18	+	58862600	58986480	9.98682	0.00656682
ENSG00000074660	SCARF1	17	-	1633858	1645747	0.0279152	0.0522923
ENSG00000074695	LMAN1	18	-	59327823	59359962	18.3535	9.01782
ENSG00000074696	HACD3	15	+	65530418	65578352	16.4817	13.9111
ENSG00000074706	IPCEF1	6	-	154154496	154356792	0	0.124378
ENSG00000074755	ZZEF1	17	-	4004445	4143020	10.4879	11.2314
ENSG00000074771	NOX3	6	-	155395370	155455903	0	0
ENSG00000074800	ENO1	1	-	8861002	8879249	294.005	406.65
ENSG00000074803	SLC12A1	15	+	48191664	48304078	0.0164201	0.0124967
ENSG00000074842	MYDGF	19	-	4641374	4670370	3.73943	17.426
ENSG00000074855	ANO8	19	-	17323223	17334829	3.14982	0.170918
ENSG00000074935	TUBE1	6	-	112070777	112087529	5.08635	2.02154
ENSG00000074964	ARHGEF10L	1	+	17539835	17697874	2.49772	9.99231
ENSG00000074966	TXK	4	-	48066393	48134256	0.0373375	0.15929
ENSG00000075035	WSCD2	12	+	108129471	108250537	0	0.689213
ENSG00000075043	KCNQ2	20	-	63400210	63472677	0.229221	0
ENSG00000075073	TACR2	10	-	69403903	69416867	0.104574	0.531462
ENSG00000075089	ACTR6	12	+	100199122	100241865	4.55154	1.43902
ENSG00000075131	TIPIN	15	-	66336206	66386746	6.1501	2.50834
ENSG00000075142	SRI	7	-	88205118	88226993	8.19431	12.6934
ENSG00000075151	EIF4G3	1	-	20806292	21176888	8.68898	8.76927
ENSG00000075188	NUP37	12	-	102073103	102120124	6.86345	16.0388
ENSG00000075213	SEMA3A	7	-	83955777	84492724	0.997685	5.76026
ENSG00000075218	GTSE1	22	+	46296741	46330810	10.1737	7.63342
ENSG00000075223	SEMA3C	7	-	80742538	80922359	9.71775	55.0511
ENSG00000075234	TTC38	22	+	46267961	46294008	2.85108	5.60034
ENSG00000075239	ACAT1	11	+	108121516	108147776	7.97133	8.44183
ENSG00000075240	GRAMD4	22	+	46576012	46679790	5.22667	3.91902
ENSG00000075275	CELSR1	22	-	46360834	46537170	7.55692	6.29304
ENSG00000075290	WNT8B	10	+	100463041	100483744	0.097166	0.228948
ENSG00000075292	ZNF638	2	+	71276561	71435069	15.5794	4.24772
ENSG00000075303	SLC25A40	7	-	87833568	87876357	2.20219	1.89504
ENSG00000075336	TIMM21	18	+	74148511	74160530	1.41355	1.44158
ENSG00000075340	ADD2	2	-	70607618	70768225	4.73012	0.0183211
ENSG00000075388	FGF4	11	-	69771016	69775403	0	0
ENSG00000075391	RASAL2	1	+	178094141	178484147	5.06571	1.36113
ENSG00000075399	VPS9D1	16	-	89707134	89720986	3.44684	7.29961
ENSG00000075407	ZNF37A	10	+	38094336	38125544	3.03007	1.13352
ENSG00000075413	MARK3	14	+	103385392	103503831	17.382	11.2845
ENSG00000075415	SLC25A3	12	+	98593591	98606379	39.0571	54.6544
ENSG00000075420	FNDC3B	3	+	172039628	172401665	6.71782	9.43505
ENSG00000075426	FOSL2	2	+	28392448	28417312	5.53543	61.8245
ENSG00000075429	CACNG5	17	+	66835117	66885486	0	0
ENSG00000075461	CACNG4	17	+	66964910	67033398	10.4101	3.19271
ENSG00000075539	FRYL	4	-	48497361	48780322	4.11053	3.26077
ENSG00000075568	TMEM131	2	-	97756333	97995891	5.5769	4.39888
ENSG00000075618	FSCN1	7	+	5592823	5606655	9.24366	30.274
ENSG00000075624	ACTB	7	-	5527151	5563784	528.818	534.288
ENSG00000075643	MOCOS	18	+	36187519	36272157	21.6854	29.107
ENSG00000075651	PLD1	3	-	171600405	171810950	0.808392	0.256506
ENSG00000075673	ATP12A	13	+	24680411	24712493	0.13916	0.0514966
ENSG00000075702	WDR62	19	+	36054881	36105106	4.62922	7.52928
ENSG00000075711	DLG1	3	-	197042560	197299300	16.7367	8.5566
ENSG00000075785	RAB7A	3	+	128726122	128814796	22.7956	32.7737
ENSG00000075790	BCAP29	7	+	107579977	107629170	4.36436	0.905193
ENSG00000075826	SEC31B	10	-	100486642	100519864	0.351249	0.0101493
ENSG00000075856	SART3	12	-	108522580	108561400	7.18869	10.5441
ENSG00000075884	ARHGAP15	2	+	143091362	143768352	0.00156814	0.00263021
ENSG00000075886	TUBA3D	2	+	131476093	131482934	1.53722	0.69108
ENSG00000075891	PAX2	10	+	100735603	100829941	0.00769909	0
ENSG00000075914	EXOSC7	3	+	44975241	45036066	4.25339	6.00084
ENSG00000075945	KIFAP3	1	-	169921326	170085208	5.58337	2.46158
ENSG00000075975	MKRN2	3	+	12557014	12583713	8.41556	7.24414
ENSG00000076003	MCM6	2	-	135839626	135876426	34.55	34.6506
ENSG00000076043	REXO2	11	+	114439386	114450279	18.4689	13.9118
ENSG00000076053	RBM7	11	+	114400030	114414203	5.2056	1.43912
ENSG00000076067	RBMS2	12	+	56521929	56596196	4.80635	7.239
ENSG00000076108	BAZ2A	12	-	56595596	56636816	8.83178	16.5376
ENSG00000076201	PTPN23	3	+	47381011	47413441	13.4325	7.16779
ENSG00000076242	MLH1	3	+	36993332	37050918	29.7503	19.4383
ENSG00000076248	UNG	12	+	109097574	109110992	9.75136	27.3057
ENSG00000076258	FMO4	1	+	171314208	171342084	0.20989	0.0851125
ENSG00000076321	KLHL20	1	+	173714941	173786702	5.90216	5.17431
ENSG00000076344	RGS11	16	-	268301	275980	0.316799	0.00455569
ENSG00000076351	SLC46A1	17	-	28394756	28407197	4.04369	3.66047
ENSG00000076356	PLXNA2	1	-	208022242	208244320	5.31437	33.7153
ENSG00000076382	SPAG5	17	-	28577565	28599279	21.3407	15.7644
ENSG00000076513	ANKRD13A	12	+	109999186	110039763	46.8992	8.35499
ENSG00000076554	TPD52	8	-	80034745	80231232	5.56577	1.36973
ENSG00000076555	ACACB	12	+	109116595	109268226	1.24195	0.578015
ENSG00000076604	TRAF4	17	+	28743984	28750958	15.1198	38.0772
ENSG00000076641	PAG1	8	-	80967810	81112068	0.282145	1.93026
ENSG00000076650	GPATCH1	19	+	33080880	33130542	6.64828	6.06129
ENSG00000076662	ICAM3	19	-	10333776	10339823	2.57611	1.48477
ENSG00000076685	NT5C2	10	-	103088017	103193306	15.6587	12.9415
ENSG00000076706	MCAM	11	-	119308529	119321521	4.04771	0.070375
ENSG00000076716	GPC4	X	-	133300103	133415490	0.060855	0.622506
ENSG00000076770	MBNL3	X	-	132369317	132489968	0.224168	0.47775
ENSG00000076826	CAMSAP3	19	+	7595902	7618304	3.67319	2.22497
ENSG00000076864	RAP1GAP	1	-	21596215	21669363	2.46647	4.60178
ENSG00000076924	XAB2	19	-	7619525	7629565	5.67795	11.0734
ENSG00000076928	ARHGEF1	19	+	41883161	41930150	6.03403	18.3113
ENSG00000076944	STXBP2	19	+	7636881	7647873	3.1423	11.0894
ENSG00000076984	MAP2K7	19	+	7903843	7914478	3.51561	6.09451
ENSG00000077009	NMRK2	19	+	3933103	3942416	0.037014	0.00348987
ENSG00000077044	DGKD	2	+	233354507	233472104	6.73501	6.85398
ENSG00000077063	CTTNBP2	7	-	117710651	117874139	0	0
ENSG00000077080	ACTL6B	7	-	100643097	100656461	0.0216988	0.0260823
ENSG00000077092	RARB	3	+	25174332	25597932	0.250767	0.202386
ENSG00000077097	TOP2B	3	-	25597905	25664907	16.7366	14.3426
ENSG00000077147	TM9SF3	10	-	96518109	96587452	24.3245	5.57864
ENSG00000077150	NFKB2	10	+	102394110	102402529	17.5175	18.0782
ENSG00000077152	UBE2T	1	-	202331657	202341980	6.04875	15.4814
ENSG00000077157	PPP1R12B	1	+	202348699	202592706	1.74566	2.4239
ENSG00000077232	DNAJC10	2	+	182716041	182794464	4.16864	2.6391
ENSG00000077235	GTF3C1	16	-	27459555	27549913	14.6652	27.0879
ENSG00000077238	IL4R	16	+	27313668	27364778	2.31455	23.8145
ENSG00000077254	USP33	1	-	77695987	77759852	13.2179	6.28406
ENSG00000077264	PAK3	X	+	110944285	111227361	0.0774903	0.00258525
ENSG00000077274	CAPN6	X	-	111245103	111270523	0.039559	0
ENSG00000077279	DCX	X	-	111293780	111412375	0	0
ENSG00000077312	SNRPA	19	+	40750637	40765389	26.2458	18.8089
ENSG00000077327	SPAG6	10	+	22345445	22454224	0.0352835	0
ENSG00000077348	EXOSC5	19	-	41386374	41397479	13.8947	12.8208
ENSG00000077380	DYNC1I2	2	+	171687409	171748420	15.5771	12.3034
ENSG00000077420	APBB1IP	10	+	26438203	26567803	0.0211282	0.00932159
ENSG00000077454	LRCH4	7	-	100574011	100586153	1.49554	2.58896
ENSG00000077458	FAM76B	11	-	95768942	95790409	4.71979	1.029
ENSG00000077463	SIRT6	19	-	4174109	4182604	3.03401	5.74767
ENSG00000077498	TYR	11	+	89177452	89295759	0	0
ENSG00000077514	POLD3	11	+	74493851	74669117	8.03051	5.97078
ENSG00000077522	ACTN2	1	+	236686454	236764631	0.0204858	0
ENSG00000077549	CAPZB	1	-	19338776	19485539	39.6366	50.7285
ENSG00000077585	GPR137B	1	+	236142505	236221865	3.43548	4.24976
ENSG00000077616	NAALAD2	11	+	90131515	90192894	0.0892629	0.00952113
ENSG00000077684	JADE1	4	+	128809623	128875224	0.879213	0.965472
ENSG00000077713	SLC25A43	X	+	119399060	119454478	3.59114	8.5602
ENSG00000077721	UBE2A	X	+	119574467	119591083	8.43764	8.38713
ENSG00000077782	FGFR1	8	-	38411138	38468834	0.492059	0.0506948
ENSG00000077800	FKBP6	7	+	73328164	73358637	0.0319471	0.00546735
ENSG00000077935	SMC1B	22	-	45344063	45413619	0.109232	0.0921839
ENSG00000077942	FBLN1	22	+	45502238	45601135	5.77611	55.0016
ENSG00000077943	ITGA8	10	-	15513949	15720125	0	0
ENSG00000077984	CST7	20	+	24949230	24959928	0.476362	0.369909
ENSG00000078018	MAP2	2	+	209424058	209734118	0.0827172	0.00438231
ENSG00000078043	PIAS2	18	-	46803224	46920160	1.772	0.713626
ENSG00000078053	AMPH	7	-	38383704	38631567	0	0.491483
ENSG00000078061	ARAF	X	+	47561100	47571920	12.1232	17.427
ENSG00000078070	MCCC1	3	-	183015218	183116075	6.47645	25.3665
ENSG00000078081	LAMP3	3	-	183122213	183163839	1.96265	0.554547
ENSG00000078098	FAP	2	-	162170684	162245151	0.140574	0.00535705
ENSG00000078114	NEBL	10	-	20779973	21174187	0.459841	0.208721
ENSG00000078124	ACER3	11	+	76860867	77026797	3.56326	2.72364
ENSG00000078140	UBE2K	4	+	39698044	39782792	3.78024	6.59819
ENSG00000078142	PIK3C3	18	+	41955206	42087830	3.93571	1.67808
ENSG00000078177	N4BP2	4	+	40056826	40158252	3.3859	1.07781
ENSG00000078237	TIGAR	12	+	4307763	4354593	2.20332	1.75825
ENSG00000078246	TULP3	12	+	2877223	2941140	3.59485	6.43337
ENSG00000078269	SYNJ2	6	+	157981887	158099176	12.5512	11.796
ENSG00000078295	ADCY2	5	+	7396208	7830081	0	0
ENSG00000078304	PPP2R5C	14	+	101761798	101927989	6.53358	6.01298
ENSG00000078328	RBFOX1	16	+	6019094	7713338	0	0.0109921
ENSG00000078369	GNB1	1	-	1785285	1891117	50.1314	65.1441
ENSG00000078399	HOXA9	7	-	27162435	27175180	0.826003	0.125037
ENSG00000078401	EDN1	6	+	12290363	12297194	29.7225	1.20905
ENSG00000078403	MLLT10	10	+	21524675	21743630	9.14086	4.9178
ENSG00000078487	ZCWPW1	7	-	100400826	100428992	2.98715	0.516486
ENSG00000078549	ADCYAP1R1	7	+	31052461	31111479	0.0588279	0
ENSG00000078579	FGF20	8	-	16992169	17002181	0	0
ENSG00000078589	P2RY10	X	+	78945332	78961954	0	0
ENSG00000078596	ITM2A	X	-	79360384	79367667	0	0
ENSG00000078618	NRDC	1	-	51789191	51878937	27.0574	28.655
ENSG00000078668	VDAC3	8	+	42391624	42405897	18.125	19.6817
ENSG00000078674	PCM1	8	+	17922840	18029944	19.0031	6.20139
ENSG00000078687	TNRC6C	17	+	78004168	78108835	0.869932	1.62162
ENSG00000078699	CBFA2T2	20	+	33490075	33650036	6.2479	6.75375
ENSG00000078725	BRINP1	9	-	119153458	119369467	0.0184621	0
ENSG00000078747	ITCH	20	+	34363235	34511393	51.1005	35.2805
ENSG00000078795	PKD2L2	5	+	137887968	137942747	0.125973	0.182277
ENSG00000078804	TP53INP2	20	+	34704290	34713439	2.9238	2.47906
ENSG00000078808	SDF4	1	-	1216908	1232031	10.8161	16.8312
ENSG00000078814	MYH7B	20	+	34975403	35002437	0.169181	0.256767
ENSG00000078898	BPIFB2	20	+	33007600	33023709	0	0
ENSG00000078900	TP73	1	+	3652520	3736201	7.00007	0.05304
ENSG00000078902	TOLLIP	11	-	1274371	1309654	3.20098	6.57592
ENSG00000078967	UBE2D4	7	+	43926438	43956136	0.289224	0.329665
ENSG00000079101	CLUL1	18	+	596988	650334	0.0287488	0.0402405
ENSG00000079102	RUNX1T1	8	-	91954967	92103286	0.000870179	0.00193051
ENSG00000079112	CDH17	8	-	94127171	94217303	0.0228301	0.00247368
ENSG00000079134	THOC1	18	-	214520	268050	3.38065	2.62514
ENSG00000079150	FKBP7	2	-	178463664	178478600	0.0442332	0.0563379
ENSG00000079156	OSBPL6	2	+	178194481	178402891	0.644009	0.0199304
ENSG00000079215	SLC1A3	5	+	36606355	36688334	5.98883	9.2625
ENSG00000079246	XRCC5	2	+	216107464	216206303	69.8111	86.5157
ENSG00000079257	LXN	3	-	158645822	158672693	3.66586	2.7115
ENSG00000079263	SP140	2	+	230203110	230313215	0.149716	0.150997
ENSG00000079277	MKNK1	1	-	46557408	46616843	3.02977	4.86315
ENSG00000079308	TNS1	2	-	217799789	218002995	1.65897	0.181421
ENSG00000079313	REXO1	19	-	1815246	1848463	5.53162	5.48063
ENSG00000079332	SAR1A	10	-	70147289	70170523	17.3027	8.71337
ENSG00000079335	CDC14A	1	+	100345025	100520277	0.89863	0.825357
ENSG00000079337	RAPGEF3	12	-	47734367	47771040	0.591806	2.6271
ENSG00000079385	CEACAM1	19	-	42507304	42561234	0.47182	1.71254
ENSG00000079387	SENP1	12	-	48042898	48106308	3.34281	3.7966
ENSG00000079393	DUSP13	10	-	75094432	75109221	0.320754	0.107088
ENSG00000079432	CIC	19	+	42268537	42295797	9.52825	12.4934
ENSG00000079435	LIPE	19	-	42401507	42427426	1.06747	5.71272
ENSG00000079459	FDFT1	8	+	11795573	11839309	13.4088	134.57
ENSG00000079462	PAFAH1B3	19	-	42297033	42303546	19.3076	37.6093
ENSG00000079482	OPHN1	X	-	68042344	68433913	5.7033	1.04547
ENSG00000079557	AFM	4	+	73481683	73504001	0	0.0754875
ENSG00000079616	KIF22	16	+	29790719	29805385	39.2777	35.0593
ENSG00000079689	SCGN	6	+	25652201	25701783	0.0794034	0
ENSG00000079691	LRRC16A	6	+	25279078	25620530	13.4965	6.36966
ENSG00000079739	PGM1	1	+	63593276	63660245	12.3135	11.6458
ENSG00000079785	DDX1	2	+	15591178	15631111	53.67	33.0513
ENSG00000079805	DNM2	19	+	10718079	10833488	30.0984	15.4336
ENSG00000079819	EPB41L2	6	-	130839347	131063322	7.44192	1.11483
ENSG00000079841	RIMS1	6	+	71886703	72403143	0.00375818	0
ENSG00000079931	MOXD1	6	-	132296055	132401545	0.479102	0.0144056
ENSG00000079950	STX7	6	-	132445867	132513198	2.07098	1.34848
ENSG00000079974	RABL2B	22	-	50767501	50783663	2.87927	2.62355
ENSG00000079999	KEAP1	19	-	10486120	10503741	15.808	17.1371
ENSG00000080007	DDX43	6	+	73394748	73417569	0.0864492	0.11444
ENSG00000080031	PTPRH	19	-	55181248	55209506	0.267762	0.0292542
ENSG00000080166	DCT	13	-	94436808	94479682	0.00323078	0
ENSG00000080189	SLC35C2	20	-	46345980	46364458	4.14118	8.04313
ENSG00000080200	CRYBG3	3	+	97822040	97944963	6.34118	1.91656
ENSG00000080224	EPHA6	3	+	96814581	97752460	0.0387831	0.0402319
ENSG00000080293	SCTR	2	-	119439843	119525301	0	0
ENSG00000080298	RFX3	9	-	3218297	3526004	0.52289	0.277147
ENSG00000080345	RIF1	2	+	151409883	151508013	18.4951	3.48696
ENSG00000080371	RAB21	12	+	71754874	71800285	2.37623	2.30417
ENSG00000080493	SLC4A4	4	+	71187286	71572087	0.015799	0.0030401
ENSG00000080503	SMARCA2	9	+	2015219	2193624	6.166	1.93479
ENSG00000080511	RDH8	19	+	10013249	10022279	0	0.0450031
ENSG00000080546	SESN1	6	-	108986437	109094819	2.56389	1.91139
ENSG00000080561	MID2	X	+	107825755	107927193	3.23759	3.90439
ENSG00000080572	PIH1D3	X	+	107206632	107244243	0.00326353	0
ENSG00000080573	COL5A3	19	-	9959561	10010471	0.458001	0
ENSG00000080603	SRCAP	16	+	30698209	30741409	16.0954	20.1384
ENSG00000080608	PUM3	9	-	2720469	2844241	18.1824	6.89969
ENSG00000080618	CPB2	13	-	46053186	46105076	0.203298	0.0505218
ENSG00000080644	CHRNA3	15	-	78593052	78621295	0.386264	0.430222
ENSG00000080709	KCNN2	5	+	114360945	114496500	0.0124385	0
ENSG00000080802	CNOT4	7	-	135361795	135510127	3.9005	1.74067
ENSG00000080815	PSEN1	14	+	73136418	73223691	8.68086	8.29704
ENSG00000080819	CPOX	3	-	98521132	98593723	3.71089	4.52899
ENSG00000080822	CLDND1	3	-	98497912	98523066	8.91917	4.70071
ENSG00000080823	MOK	14	-	102224500	102305200	0.682914	0.781034
ENSG00000080824	HSP90AA1	14	-	102080738	102139699	88.8076	155.039
ENSG00000080839	RBL1	20	-	36996349	37095995	19.4939	5.13853
ENSG00000080845	DLGAP4	20	+	36306336	36528637	5.63461	2.61274
ENSG00000080854	IGSF9B	11	-	133908564	133956985	2.06022	0.258256
ENSG00000080910	CFHR2	1	+	196943772	196959226	0	0
ENSG00000080947	CROCCP3	1	-	16467436	16499257	1.42327	0.478223
ENSG00000080986	NDC80	18	+	2571511	2616635	46.1796	12.1807
ENSG00000081014	AP4E1	15	+	50908672	51005900	5.56122	3.11743
ENSG00000081019	RSBN1	1	-	113761832	113812476	2.31424	3.09865
ENSG00000081026	MAGI3	1	+	113390749	113685923	1.34879	1.22567
ENSG00000081041	CXCL2	4	-	74097035	74099293	0.143017	0
ENSG00000081051	AFP	4	+	73431138	73456174	0	0
ENSG00000081052	COL4A4	2	-	227002711	227164113	1.72846	0.062761
ENSG00000081059	TCF7	5	+	134114711	134151865	0.501234	1.23515
ENSG00000081087	OSTM1	6	-	108041409	108165854	6.58283	1.80986
ENSG00000081138	CDH7	18	+	65750252	65890341	0.000826869	0.00542764
ENSG00000081148	IMPG2	3	-	101222546	101320560	0.019313	0.031363
ENSG00000081154	PCNP	3	+	101574095	101594437	6.01934	1.79925
ENSG00000081177	EXD2	14	+	69191511	69244020	4.27173	4.5478
ENSG00000081181	ARG2	14	+	67619798	67651720	2.24432	11.2015
ENSG00000081189	MEF2C	5	-	88717117	88904257	0.0158182	0.0269492
ENSG00000081237	PTPRC	1	+	198638671	198757283	0.0535477	0.0402992
ENSG00000081248	CACNA1S	1	-	201039512	201112566	0.00779247	0
ENSG00000081277	PKP1	1	+	201283452	201332993	2.27977	0
ENSG00000081307	UBA5	3	+	132654446	132678097	4.65309	3.15563
ENSG00000081320	STK17B	2	-	196133566	196176503	2.01784	2.77029
ENSG00000081377	CDC14B	9	-	96490241	96619830	1.90451	2.11429
ENSG00000081386	ZNF510	9	-	96755865	96778129	2.37214	0.862318
ENSG00000081479	LRP2	2	-	169127109	169362685	0.00147775	0.0438385
ENSG00000081665	ZNF506	19	-	19785839	19821751	0.153209	0.141366
ENSG00000081692	JMJD4	1	-	227730425	227735411	5.09477	6.87962
ENSG00000081721	DUSP12	1	+	161749758	161757238	5.60073	9.6645
ENSG00000081760	AACS	12	+	125065379	125143333	2.67723	3.26119
ENSG00000081791	KIAA0141	5	+	141923808	141942047	8.12028	10.3628
ENSG00000081800	SLC13A1	7	-	123113531	123199986	0	0
ENSG00000081803	CADPS2	7	-	122318425	122886759	0.00378421	0.734651
ENSG00000081818	PCDHB4	5	+	141121799	141125623	0	0.404369
ENSG00000081842	PCDHA6	5	+	140827958	141012344	1.75e-06	0.0443631
ENSG00000081853	PCDHGA2	5	+	141338760	141512979	0.0212894	0.0567222
ENSG00000081870	HSPB11	1	-	53916574	53945929	4.45372	2.10687
ENSG00000081913	PHLPP1	18	+	62715450	62980433	4.13611	7.89255
ENSG00000081923	ATP8B1	18	-	57646426	57803101	11.9878	22.9296
ENSG00000081985	IL12RB2	1	+	67307364	67396900	0.114493	0.162507
ENSG00000082014	SMARCD3	7	-	151238764	151277896	2.01314	0.409794
ENSG00000082068	WDR70	5	+	37379212	37753435	7.50651	6.23612
ENSG00000082074	FYB	5	-	39105236	39274528	0.212102	0.539436
ENSG00000082126	MPP4	2	-	201644870	201698694	0.0239469	0.00673035
ENSG00000082146	STRADB	2	+	201387858	201480846	9.50864	3.11295
ENSG00000082153	BZW1	2	+	200810594	200827338	27.1397	15.7965
ENSG00000082175	PGR	11	-	101029624	101130524	0.00468025	0
ENSG00000082196	C1QTNF3	5	-	34019448	34043832	0.0366103	0.0492761
ENSG00000082212	ME2	18	+	50879049	50954257	7.24302	3.96432
ENSG00000082213	C5orf22	5	+	31532266	31555058	15.0891	3.29076
ENSG00000082258	CCNT2	2	+	134918235	134959342	2.34715	2.02928
ENSG00000082269	FAM135A	6	+	70412941	70561174	1.27837	0.688829
ENSG00000082293	COL19A1	6	+	69866571	70209976	0	0
ENSG00000082397	EPB41L3	18	-	5392381	5630700	0.0065616	0.00464687
ENSG00000082438	COBLL1	2	-	164653624	164843679	1.16059	2.55513
ENSG00000082458	DLG3	X	+	70444861	70505490	3.45966	7.65938
ENSG00000082482	KCNK2	1	+	215005775	215237093	0	0.0388435
ENSG00000082497	SERTAD4	1	+	210232799	210246631	2.64599	0.839899
ENSG00000082512	TRAF5	1	+	211326615	211374946	1.08449	0.513418
ENSG00000082515	MRPL22	5	+	154941070	154969411	9.19339	4.6
ENSG00000082516	GEMIN5	5	-	154887416	154938209	30.1679	17.0482
ENSG00000082556	OPRK1	8	-	53225716	53251697	0.00418813	0
ENSG00000082641	NFE2L1	17	+	48048329	48061487	29.3096	41.9963
ENSG00000082684	SEMA5B	3	-	122909193	123028605	0.0139051	0
ENSG00000082701	GSK3B	3	-	119821323	120094417	15.5978	6.80423
ENSG00000082781	ITGB5	3	-	124761948	124901418	10.1484	15.9846
ENSG00000082805	ERC1	12	+	990509	1495933	4.18089	2.35366
ENSG00000082898	XPO1	2	-	61477849	61538626	33.9027	15.4311
ENSG00000082929	.	4	+	5524569	5527801	0	0
ENSG00000082996	RNF13	3	+	149812708	149962139	5.68944	6.49109
ENSG00000083067	TRPM3	9	-	70529063	71446904	0.0024138	0
ENSG00000083093	PALB2	16	-	23603160	23641310	19.368	8.2826
ENSG00000083097	DOPEY1	6	+	83067666	83171350	3.74272	5.58036
ENSG00000083099	LYRM2	6	-	89568144	89638753	3.65121	1.92869
ENSG00000083123	BCKDHB	6	+	80106647	80346270	4.02832	5.69507
ENSG00000083168	KAT6A	8	-	41929479	42051990	10.3051	13.1482
ENSG00000083223	ZCCHC6	9	-	86287733	86354454	8.28677	4.24237
ENSG00000083290	ULK2	17	-	19770829	19867936	3.71855	0.0158226
ENSG00000083307	GRHL2	8	+	101492432	101669726	26.4878	42.5766
ENSG00000083312	TNPO1	5	+	72816312	72916733	21.5874	13.2245
ENSG00000083444	PLOD1	1	+	11934205	11975538	12.4931	12.3841
ENSG00000083454	P2RX5	17	-	3672199	3696404	0.966456	0.0259116
ENSG00000083457	ITGAE	17	-	3714628	3801243	1.74718	2.12615
ENSG00000083520	DIS3	13	-	72752169	72782096	4.93281	3.90296
ENSG00000083535	PIBF1	13	+	72782059	73016461	3.93622	1.57039
ENSG00000083544	TDRD3	13	+	60396457	60573878	2.39411	1.50131
ENSG00000083622	AC000111.6	7	-	117604791	117647415	0	0
ENSG00000083635	NUFIP1	13	-	44939249	44989483	8.72744	4.81067
ENSG00000083642	PDS5B	13	+	32586427	32778019	9.26004	3.54972
ENSG00000083720	OXCT1	5	-	41730065	41870519	11.4365	4.17172
ENSG00000083750	RRAGB	X	+	55717739	55758774	3.93264	2.16571
ENSG00000083782	EPYC	12	-	90963679	91005026	0.00702057	0.0702645
ENSG00000083799	CYLD	16	+	50742050	50801935	3.02754	2.0003
ENSG00000083807	SLC27A5	19	-	58479512	58512413	0.229389	0.678981
ENSG00000083812	ZNF324	19	+	58467045	58475436	1.43612	2.76773
ENSG00000083814	ZNF671	19	-	57719751	57727624	0.245196	0
ENSG00000083817	ZNF416	19	-	57571566	57578927	1.97972	2.11526
ENSG00000083828	ZNF586	19	+	57769655	57819939	1.97144	4.63442
ENSG00000083838	ZNF446	19	+	58474017	58481230	1.2965	4.87821
ENSG00000083844	ZNF264	19	+	57191500	57222846	4.45543	3.80794
ENSG00000083845	RPS5	19	+	58386400	58394806	88.8824	152.202
ENSG00000083857	FAT1	4	-	186587783	186726722	7.34661	105.608
ENSG00000083896	YTHDC1	4	-	68310387	68350089	14.155	7.51853
ENSG00000083937	CHMP2B	3	+	87227271	87255548	19.3696	8.54475
ENSG00000084070	SMAP2	1	+	40344850	40423326	5.1713	13.8906
ENSG00000084072	PPIE	1	+	39692182	39763914	3.12872	5.80287
ENSG00000084073	ZMPSTE24	1	+	40258107	40294184	34.2892	20.79
ENSG00000084090	STARD7	2	-	96184859	96208825	20.2741	28.2523
ENSG00000084092	NOA1	4	-	56963370	56978823	4.82683	5.90099
ENSG00000084093	REST	4	+	56907876	56935844	5.88479	5.19858
ENSG00000084110	HAL	12	-	95972662	95996365	0.0164263	0.0774387
ENSG00000084112	SSH1	12	-	108778192	108857590	8.64391	3.54026
ENSG00000084207	GSTP1	11	+	67583595	67586660	71.1288	225.675
ENSG00000084234	APLP2	11	+	130069837	130144811	23.8029	89.0131
ENSG00000084444	FAM234B	12	+	13044284	13142521	0.722052	6.30605
ENSG00000084453	SLCO1A2	12	-	21264600	21419594	0	0.0297285
ENSG00000084463	WBP11	12	-	14784579	14803540	13.6513	23.7976
ENSG00000084623	EIF3I	1	+	32221928	32231604	76.9242	143.512
ENSG00000084628	NKAIN1	1	-	31179745	31239554	0.0812982	0.0339794
ENSG00000084636	COL16A1	1	-	31652247	31704319	0.168076	0.0324194
ENSG00000084652	TXLNA	1	+	32179686	32198285	28.5012	17.4535
ENSG00000084674	APOB	2	-	21001429	21044073	0	0
ENSG00000084676	NCOA1	2	+	24491914	24770702	8.76123	5.66733
ENSG00000084693	AGBL5	2	+	27042364	27070622	14.9402	12.6847
ENSG00000084710	EFR3B	2	+	25042130	25159137	2.54754	0.0634589
ENSG00000084731	KIF3C	2	-	25926596	25982749	3.16956	1.47312
ENSG00000084733	RAB10	2	+	26034107	26137454	46.769	31.6383
ENSG00000084734	GCKR	2	+	27496842	27523684	0	0
ENSG00000084754	HADHA	2	-	26190635	26244726	65.1141	124.766
ENSG00000084764	MAPRE3	2	+	26970612	27027196	1.46345	2.79427
ENSG00000084774	CAD	2	+	27217390	27243943	31.1725	43.0365
ENSG00000085063	CD59	11	-	33698261	33736445	10.3532	9.34191
ENSG00000085117	CD82	11	+	44564427	44620363	8.94836	10.5999
ENSG00000085185	BCORL1	X	+	129981107	130058083	1.21462	0.874581
ENSG00000085224	ATRX	X	-	77504878	77786269	4.28195	1.68792
ENSG00000085231	AK6	5	-	69350984	69370013	4.38673	0.769412
ENSG00000085265	FCN1	9	-	134905890	134917963	0.00482463	0.00510228
ENSG00000085274	MYNN	3	+	169772831	169789716	3.35736	2.08097
ENSG00000085276	MECOM	3	-	169083499	169663618	0.104372	14.8323
ENSG00000085365	SCAMP1	5	+	78360583	78479071	4.6082	4.11712
ENSG00000085377	PREP	6	-	105277565	105403084	16.477	34.7802
ENSG00000085382	HACE1	6	-	104728093	104859919	2.20305	0.947879
ENSG00000085415	SEH1L	18	+	12947133	12987536	6.03568	6.58546
ENSG00000085433	WDR47	1	-	108970214	109042113	5.84394	5.36343
ENSG00000085449	WDFY1	2	-	223855716	223945387	7.47051	3.94906
ENSG00000085465	OVGP1	1	-	111414314	111427777	0.238117	0.858353
ENSG00000085491	SLC25A24	1	-	108134036	108200849	18.532	5.74678
ENSG00000085511	MAP3K4	6	+	160991727	161117385	6.40938	6.01772
ENSG00000085514	PILRA	7	+	100367530	100400099	0.16084	0.075282
ENSG00000085552	IGSF9	1	-	159927039	159945604	0.836727	2.08356
ENSG00000085563	ABCB1	7	-	87503633	87713323	0.0186265	0.150969
ENSG00000085644	ZNF213	16	+	3129777	3142805	2.62664	1.85659
ENSG00000085662	AKR1B1	7	-	134442350	134459284	19.6772	330.525
ENSG00000085719	CPNE3	8	+	86484830	86561498	20.5539	19.5162
ENSG00000085721	RRN3	16	-	15060022	15094317	27.4897	18.4103
ENSG00000085733	CTTN	11	+	70398404	70436584	15.6511	22.4774
ENSG00000085741	WNT11	11	-	76186325	76210736	0.160836	1.60496
ENSG00000085760	MTIF2	2	-	55236595	55269347	17.2307	11.8291
ENSG00000085788	DDHD2	8	+	38225218	38275558	7.43447	5.05124
ENSG00000085831	TTC39A	1	-	51287258	51345116	0.197392	1.30525
ENSG00000085832	EPS15	1	-	51354263	51519328	18.3573	15.9718
ENSG00000085840	ORC1	1	-	52372829	52404459	13.8568	8.96997
ENSG00000085871	MGST2	4	+	139665768	139740745	1.92216	6.76818
ENSG00000085872	CHERP	19	-	16517889	16542530	8.73135	4.20321
ENSG00000085978	ATG16L1	2	+	233210051	233295674	7.36299	5.03876
ENSG00000085982	USP40	2	-	233475520	233566782	8.64234	10.5008
ENSG00000085998	POMGNT1	1	-	46188682	46220305	6.95155	24.5436
ENSG00000085999	RAD54L	1	+	46247688	46278473	12.4125	10.5968
ENSG00000086015	MAST2	1	+	45786987	46036124	16.506	8.99751
ENSG00000086061	DNAJA1	9	+	33025211	33039907	19.6717	12.8444
ENSG00000086062	B4GALT1	9	-	33104082	33167356	59.2373	51.1884
ENSG00000086065	CHMP5	9	+	33264879	33282069	27.8077	9.22176
ENSG00000086102	NFX1	9	+	33290511	33371157	10.639	4.70179
ENSG00000086159	AQP6	12	+	49967194	49977139	0.041728	0.054051
ENSG00000086189	DIMT1	5	-	62387254	62403939	6.76118	11.4369
ENSG00000086200	IPO11	5	+	62403972	62628582	9.6497	4.6685
ENSG00000086205	FOLH1	11	-	49146635	49208670	0	0
ENSG00000086232	EIF2AK1	7	-	6022244	6059230	38.97	36.4081
ENSG00000086288	NME8	7	+	37848597	37900401	0	0
ENSG00000086289	EPDR1	7	+	37683843	37951941	0.208294	0.0443427
ENSG00000086300	SNX10	7	+	26291895	26374329	9.46225	1.53315
ENSG00000086475	SEPHS1	10	-	13317424	13348298	25.8584	11.7979
ENSG00000086504	MRPL28	16	-	367384	370527	11.3708	18.6944
ENSG00000086506	HBQ1	16	+	180453	181181	0.497947	0.03791
ENSG00000086544	ITPKC	19	+	40717103	40740860	2.69006	28.0323
ENSG00000086548	CEACAM6	19	+	41750977	41772208	0	48.7603
ENSG00000086570	FAT2	5	-	151504093	151568944	0.330354	3.36245
ENSG00000086589	RBM22	5	-	150690794	150701107	44.3841	13.5352
ENSG00000086598	TMED2	12	+	123584531	123598577	65.3622	78.4594
ENSG00000086619	ERO1B	1	-	236215555	236281985	0.563482	1.27312
ENSG00000086666	ZFAND6	15	+	80059568	80138393	6.34453	6.52283
ENSG00000086696	HSD17B2	16	+	82035004	82098534	0.117523	0.658409
ENSG00000086712	TXLNG	X	+	16786427	16844519	8.64968	7.87395
ENSG00000086717	PPEF1	X	+	18675909	18827921	0.00370551	0
ENSG00000086730	LAT2	7	+	74199652	74229834	0.804338	0.343698
ENSG00000086758	HUWE1	X	-	53532096	53686729	95.7565	61.8873
ENSG00000086827	ZW10	11	-	113733187	113773811	14.1943	7.18942
ENSG00000086848	ALG9	11	-	111782195	111871581	5.29171	5.96759
ENSG00000086967	MYBPC2	19	+	50432903	50466321	0.0311558	0.00714592
ENSG00000086991	NOX4	11	-	89324356	89498187	0	0
ENSG00000087008	ACOX3	4	-	8366282	8440723	1.90442	4.87378
ENSG00000087053	MTMR2	11	-	95832882	95925315	10.0274	14.6389
ENSG00000087074	PPP1R15A	19	+	48872392	48876057	17.5373	32.2734
ENSG00000087076	HSD17B14	19	-	48813017	48836678	0.148068	12.142
ENSG00000087077	TRIP6	7	+	100867138	100873454	32.1079	42.3231
ENSG00000087085	ACHE	7	-	100889994	100896974	0.348702	0.0156079
ENSG00000087086	FTL	19	+	48965301	48966878	39.2299	766.843
ENSG00000087087	SRRT	7	+	100875111	100888664	7.71279	18.0708
ENSG00000087088	BAX	19	+	48954815	48961798	7.71193	23.5962
ENSG00000087095	NLK	17	+	28041737	28196381	3.5267	1.948
ENSG00000087111	PIGS	17	-	28553383	28571872	11.5318	19.5019
ENSG00000087116	ADAMTS2	5	-	179110851	179345430	1.47539	0
ENSG00000087128	TMPRSS11E	4	+	68447449	68497604	0.091057	0.035281
ENSG00000087152	ATXN7L3	17	-	44191805	44200113	7.50994	14.1588
ENSG00000087157	PGS1	17	+	78378640	78425114	2.74919	5.92568
ENSG00000087191	PSMC5	17	+	63827152	63832026	16.6518	26.5295
ENSG00000087206	UIMC1	5	-	176905005	177022633	21.5602	7.41291
ENSG00000087237	CETP	16	+	56961850	56983845	0.124399	0
ENSG00000087245	MMP2	16	+	55389700	55506691	8.09941	6.8125
ENSG00000087250	MT3	16	+	56589074	56591088	0	0
ENSG00000087253	LPCAT2	16	+	55508998	55586670	13.0964	5.58743
ENSG00000087258	GNAO1	16	+	56191390	56357444	1.34665	0.0283481
ENSG00000087263	OGFOD1	16	+	56451490	56479100	16.4691	13.9519
ENSG00000087266	SH3BP2	4	+	2793023	2841098	3.84999	7.78505
ENSG00000087269	NOP14	4	-	2937933	2963385	6.36161	20.9662
ENSG00000087274	ADD1	4	+	2843857	2930076	6.71368	11.1178
ENSG00000087299	L2HGDH	14	-	50237563	50312548	2.58682	3.42346
ENSG00000087301	TXNDC16	14	-	52430590	52552522	2.86555	0.76278
ENSG00000087302	C14orf166	14	+	51989475	52010691	10.2524	7.26676
ENSG00000087303	NID2	14	-	52004803	52069228	38.9618	0.0152218
ENSG00000087338	GMCL1	2	+	69829642	69881396	4.69589	4.54761
ENSG00000087365	SF3B2	11	+	66050729	66069308	19.6696	23.2637
ENSG00000087448	KLHL42	12	+	27780020	27803040	2.77803	3.82321
ENSG00000087460	GNAS	20	+	58839718	58911192	54.6745	40.6686
ENSG00000087470	DNM1L	12	+	32679200	32745650	5.18671	7.81462
ENSG00000087494	PTHLH	12	-	27958084	27972705	0.633914	0.430901
ENSG00000087495	PHACTR3	20	+	59577509	59847711	0.136994	0.669003
ENSG00000087502	ERGIC2	12	-	29337352	29381189	3.31141	2.36506
ENSG00000087510	TFAP2C	20	+	56629302	56639283	6.79899	11.5387
ENSG00000087586	AURKA	20	-	56369389	56392337	59.4971	54.4097
ENSG00000087589	CASS4	20	+	56412112	56460387	0.00825265	0.00592584
ENSG00000087842	PIR	X	-	15384799	15493564	0.0747412	21.0037
ENSG00000087884	AAMDC	11	+	77821109	77918432	0.799501	0.385371
ENSG00000087903	RFX2	19	-	5993164	6199572	0.378069	1.09732
ENSG00000087995	METTL2A	17	+	62423867	62450822	5.59426	6.38421
ENSG00000088002	SULT2B1	19	+	48552075	48599425	0.0425798	0.570925
ENSG00000088035	ALG6	1	+	63367590	63438562	1.82999	0.974438
ENSG00000088038	CNOT3	19	+	54137728	54155681	4.50761	14.0328
ENSG00000088053	GP6	19	-	55013705	55038264	0.0218289	0.785731
ENSG00000088179	PTPN4	2	+	119759631	119983818	1.85591	1.45333
ENSG00000088205	DDX18	2	+	117814650	117832379	19.6741	10.5263
ENSG00000088247	KHSRP	19	-	6413348	6424794	22.542	40.8746
ENSG00000088256	GNA11	19	+	3094410	3124004	6.69468	6.18769
ENSG00000088280	ASAP3	1	-	23428563	23484568	4.51907	5.41554
ENSG00000088298	EDEM2	20	-	35115357	35147364	10.2768	23.3333
ENSG00000088305	DNMT3B	20	+	32762385	32809356	4.37276	4.35298
ENSG00000088320	REM1	20	+	31475293	31484905	0	0
ENSG00000088325	TPX2	20	+	31739271	31801805	175.844	75.7703
ENSG00000088340	FER1L4	20	-	35558737	35607562	0.519195	12.8077
ENSG00000088356	PDRG1	20	-	31944342	31952092	34.2037	30.2015
ENSG00000088367	EPB41L1	20	+	36091504	36232799	13.9242	36.3926
ENSG00000088386	SLC15A1	13	-	98683801	98752654	0.0171601	0.770754
ENSG00000088387	DOCK9	13	-	98793487	99086625	3.77578	6.93241
ENSG00000088448	ANKRD10	13	-	110878540	110915069	10.4646	6.23326
ENSG00000088451	TGDS	13	-	94574051	94596257	3.80356	2.45445
ENSG00000088538	DOCK3	3	+	50675241	51384198	1.69079	2.99998
ENSG00000088543	C3orf18	3	-	50558025	50571027	0.350104	0
ENSG00000088682	COQ9	16	+	57447425	57461275	11.9791	19.1119
ENSG00000088726	TMEM40	3	-	12733525	12769457	15.9659	9.60172
ENSG00000088727	KIF9	3	-	47228026	47283451	0.481784	0.815118
ENSG00000088756	ARHGAP28	18	+	6729718	6915716	0.0217314	0.0890749
ENSG00000088766	CRLS1	20	+	6006090	6040053	4.88533	2.91576
ENSG00000088782	DEFB127	20	+	157470	159163	0	0
ENSG00000088808	PPP1R13B	14	-	103733752	103847590	8.31682	3.08241
ENSG00000088812	ATRN	20	+	3471040	3651122	16.0954	12.0821
ENSG00000088826	SMOX	20	+	4120980	4187747	14.9839	4.3981
ENSG00000088827	SIGLEC1	20	-	3686970	3707128	0.0172499	0
ENSG00000088832	FKBP1A	20	-	1368978	1393172	50.7575	55.6536
ENSG00000088833	NSFL1C	20	-	1442162	1473842	12.5203	10.6533
ENSG00000088836	SLC4A11	20	-	3227417	3239190	2.5439	7.7051
ENSG00000088854	C20orf194	20	-	3249305	3407625	4.46181	3.43727
ENSG00000088876	ZNF343	20	-	2481817	2524702	1.85423	0.967482
ENSG00000088881	EBF4	20	+	2692878	2760108	0.439291	0.472887
ENSG00000088882	CPXM1	20	-	2794069	2800637	0.098131	0
ENSG00000088888	MAVS	20	+	3846799	3876123	30.1508	22.85
ENSG00000088899	RP5-1187M17.10	20	-	3162617	3173592	1.71791	1.37656
ENSG00000088926	F11	4	+	186265945	186288806	0	0
ENSG00000088930	XRN2	20	+	21303304	21389827	53.7097	33.2905
ENSG00000088970	KIZ	20	+	21125983	21246622	1.85414	1.95901
ENSG00000088986	DYNLL1	12	+	120469850	120498493	18.4136	19.6317
ENSG00000088992	TESC	12	-	117038923	117099479	0.0863933	0
ENSG00000089006	SNX5	20	-	17941597	17968980	36.2325	15.2131
ENSG00000089009	RPL6	12	-	112405190	112418838	64.2613	59.1073
ENSG00000089012	SIRPG	20	-	1629152	1657779	0.0518155	0.0226728
ENSG00000089022	MAPKAPK5	12	+	111841978	111902238	3.17395	3.78422
ENSG00000089041	P2RX7	12	+	121132819	121188032	0.0383939	0.011018
ENSG00000089048	ESF1	20	-	13714322	13784886	5.96474	2.13108
ENSG00000089050	RBBP9	20	-	18486540	18497243	3.52049	4.8273
ENSG00000089053	ANAPC5	12	-	121308245	121399896	8.29022	10.8155
ENSG00000089057	SLC23A2	20	-	4852356	5010293	7.48606	18.7059
ENSG00000089060	SLC8B1	12	-	113298759	113359493	3.26547	5.13855
ENSG00000089063	TMEM230	20	-	5068232	5113103	10.8677	15.1066
ENSG00000089091	DZANK1	20	-	18383367	18467281	1.92425	0.820688
ENSG00000089094	KDM2B	12	-	121429097	121581015	4.88	4.4144
ENSG00000089101	CFAP61	20	+	20052514	20360702	0.0142866	0.0669921
ENSG00000089116	LHX5	12	-	113462034	113472280	1.10492	0.0293072
ENSG00000089123	TASP1	20	-	13389392	13638940	4.44548	6.20181
ENSG00000089127	OAS1	12	+	112906777	112933222	1.42241	8.68837
ENSG00000089154	GCN1	12	-	120127203	120194710	31.6963	100.898
ENSG00000089157	RPLP0	12	-	120196686	120201235	139.338	144.539
ENSG00000089159	PXN	12	-	120210439	120265771	29.8814	82.2699
ENSG00000089163	SIRT4	12	+	120302316	120313249	1.26107	0.127914
ENSG00000089169	RPH3A	12	+	112570380	112898881	0	0
ENSG00000089177	KIF16B	20	-	16272104	16573433	3.949	2.90072
ENSG00000089195	TRMT6	20	-	5937235	5950558	9.28049	6.1344
ENSG00000089199	CHGB	20	+	5911430	5925361	0.168336	0
ENSG00000089220	PEBP1	12	+	118135858	118145584	130.112	143.723
ENSG00000089225	TBX5	12	-	114353931	114408442	0.00550825	0
ENSG00000089234	BRAP	12	-	111642146	111685986	10.7299	10.7783
ENSG00000089248	ERP29	12	+	112013316	112023451	42.5037	24.9062
ENSG00000089250	NOS1	12	-	117208142	117452170	0.00366532	0
ENSG00000089280	FUS	16	+	31180110	31194871	17.1899	27.949
ENSG00000089289	IGBP1	X	+	70133449	70166324	14.0925	26.2787
ENSG00000089327	FXYD5	19	+	35154730	35169883	9.37924	9.51962
ENSG00000089335	ZNF302	19	+	34677639	34686397	2.36428	1.28297
ENSG00000089351	GRAMD1A	19	+	34994784	35026471	2.30645	2.18509
ENSG00000089356	FXYD3	19	+	35115879	35124324	6.17964	146.166
ENSG00000089472	HEPH	X	+	66162549	66268867	0	0
ENSG00000089486	CDIP1	16	-	4510675	4538828	4.15366	1.62895
ENSG00000089505	CMTM1	16	+	66566393	66579137	0	0
ENSG00000089558	KCNH4	17	-	42156891	42181278	0.0711032	2.71843
ENSG00000089597	GANAB	11	-	62624826	62646726	108.537	154.639
ENSG00000089639	GMIP	19	-	19629476	19643667	8.23419	8.73125
ENSG00000089682	RBM41	X	-	107064420	107118823	3.41535	1.58568
ENSG00000089685	BIRC5	17	+	78214186	78225636	36.5269	3.5101
ENSG00000089692	LAG3	12	+	6772512	6778455	0.0184806	0.015031
ENSG00000089693	MLF2	12	-	6747996	6767475	20.2189	62.5179
ENSG00000089723	OTUB2	14	+	94026329	94048930	1.24105	1.92602
ENSG00000089737	DDX24	14	-	94048291	94081245	13.5603	13.6798
ENSG00000089775	ZBTB25	14	-	64449106	64505213	1.49882	1.04957
ENSG00000089818	NECAP1	12	+	8082211	8097771	2.85392	11.8704
ENSG00000089820	ARHGAP4	X	-	153907367	153934999	0.274052	0.345085
ENSG00000089847	ANKRD24	19	+	4183354	4224814	0.0453751	0.0522067
ENSG00000089876	DHX32	10	-	125836337	125896436	22.6089	20.9448
ENSG00000089902	RCOR1	14	+	102592661	102730576	18.9553	9.62804
ENSG00000089916	GPATCH2L	14	+	76151916	76254342	1.57542	1.65172
ENSG00000090006	LTBP4	19	+	40592883	40629818	1.04791	0.586309
ENSG00000090013	BLVRB	19	-	40447789	40465840	21.0129	70.6935
ENSG00000090020	SLC9A1	1	-	27098815	27166981	4.37197	19.0567
ENSG00000090054	SPTLC1	9	-	92031999	92115384	19.6554	22.0268
ENSG00000090060	PAPOLA	14	+	96501433	96567111	12.4874	12.3296
ENSG00000090061	CCNK	14	+	99481169	99535044	3.57603	5.85939
ENSG00000090097	PCBP4	3	-	51957454	51974016	5.64118	1.61032
ENSG00000090104	RGS1	1	+	192575727	192580031	0.00583699	0.0321079
ENSG00000090238	YPEL3	16	-	30092314	30096915	0.871483	0.702978
ENSG00000090263	MRPS33	7	-	141002610	141015228	3.50678	2.48557
ENSG00000090266	NDUFB2	7	+	140690777	140722790	4.02684	6.6946
ENSG00000090273	NUDC	1	+	26900238	26946862	11.6699	20.8863
ENSG00000090316	MAEA	4	+	1289851	1340147	1.53722	4.82662
ENSG00000090339	ICAM1	19	+	10270835	10286615	11.4505	8.11845
ENSG00000090372	STRN4	19	-	46719507	46746994	14.0291	29.0647
ENSG00000090376	IRAK3	12	+	66188879	66254622	0.0231681	0.0189739
ENSG00000090382	LYZ	12	+	69348341	69354234	0.0586266	0.0288167
ENSG00000090402	SI	3	-	164978898	165078495	0	0
ENSG00000090432	MUL1	1	-	20499448	20508161	7.82505	6.73169
ENSG00000090447	TFAP4	16	-	4257186	4273075	1.87596	1.77275
ENSG00000090470	PDCD7	15	-	65117379	65133836	13.316	11.9174
ENSG00000090487	SPG21	15	-	64963021	64990310	23.5749	18.2521
ENSG00000090512	FETUB	3	+	186635969	186653141	0	0
ENSG00000090520	DNAJB11	3	+	186567403	186597203	7.89704	5.61712
ENSG00000090530	P3H2	3	-	189956728	190122437	10.8566	10.0293
ENSG00000090534	THPO	3	-	184371935	184378144	0.0732873	0.0366457
ENSG00000090539	CHRD	3	+	184380073	184390736	0.249245	0
ENSG00000090554	FLT3LG	19	+	49474207	49486231	0.772744	1.54982
ENSG00000090565	RAB11FIP3	16	+	425619	523011	3.24716	4.84131
ENSG00000090581	GNPTG	16	+	1351923	1364113	5.00143	5.23417
ENSG00000090612	ZNF268	12	+	133181409	133214831	0.743331	0.408343
ENSG00000090615	GOLGA3	12	-	132768909	132828858	8.46641	15.6494
ENSG00000090621	PABPC4	1	-	39560816	39576790	34.4774	32.2458
ENSG00000090659	CD209	19	-	7739994	7747564	0	0
ENSG00000090661	CERS4	19	+	8206736	8262421	1.11881	0.0257568
ENSG00000090674	MCOLN1	19	+	7522626	7534009	0.922019	2.41585
ENSG00000090686	USP48	1	-	21678298	21783606	7.51277	7.24685
ENSG00000090776	EFNB1	X	+	68828997	68842147	1.80162	6.54916
ENSG00000090857	PDPR	16	+	70113626	70162537	25.342	12.9228
ENSG00000090861	AARS	16	-	70252295	70289543	128.44	131.814
ENSG00000090863	GLG1	16	-	74447427	74607144	14.5829	11.2649
ENSG00000090889	KIF4A	X	+	70290090	70420832	25.6436	13.4611
ENSG00000090905	TNRC6A	16	+	24729695	24827632	6.57336	4.73227
ENSG00000090924	PLEKHG2	19	+	39412585	39428415	1.87849	1.91586
ENSG00000090932	DLL3	19	+	39498895	39508481	0.882637	0.163439
ENSG00000090971	NAT14	19	+	55485004	55487568	0.751762	1.41691
ENSG00000090975	PITPNM2	12	-	122983480	123150015	3.45818	1.54632
ENSG00000090989	EXOC1	4	+	55853616	55905034	6.04672	6.72836
ENSG00000091009	RBM27	5	+	146203600	146289132	21.3147	10.2482
ENSG00000091010	POU4F3	5	+	146339024	146340520	0.008404	0.073683
ENSG00000091039	OSBPL8	12	-	76351797	76559809	4.36517	1.7991
ENSG00000091073	DTX2	7	+	76461676	76505995	4.43416	10.6685
ENSG00000091106	NLRC4	2	-	32224453	32265854	0.195474	0.0742688
ENSG00000091127	PUS7	7	-	105439661	105522267	11.3235	5.36683
ENSG00000091128	LAMB4	7	-	108023548	108130356	0.00341411	0.00475754
ENSG00000091129	NRCAM	7	-	108147623	108456717	0.862991	0.0936545
ENSG00000091136	LAMB1	7	-	107923799	108003255	15.7887	25.8304
ENSG00000091137	SLC26A4	7	+	107660635	107717809	0.0143199	0
ENSG00000091138	SLC26A3	7	-	107765467	107803225	0.0235539	0
ENSG00000091140	DLD	7	+	107890970	107931730	20.5288	12.9047
ENSG00000091157	WDR7	18	+	56651343	57036606	2.85583	2.22389
ENSG00000091164	TXNL1	18	-	56597208	56651600	3.50917	0.776693
ENSG00000091181	IL5RA	3	-	3066326	3126613	0.000662039	0.00313493
ENSG00000091262	ABCC6	16	-	16148928	16223522	0.174415	0.154927
ENSG00000091317	CMTM6	3	-	32481312	32503408	28.2955	37.3586
ENSG00000091409	ITGA6	2	+	172427354	172506282	73.2466	49.5228
ENSG00000091428	RAPGEF4	2	+	172735274	173052893	0.102381	0.464916
ENSG00000091436	AC013461.1	2	+	173075435	173268010	2.20308	1.87867
ENSG00000091482	SMPX	X	-	21705972	21758163	0	0
ENSG00000091483	FH	1	-	241497603	241519761	42.1781	43.6448
ENSG00000091490	SEL1L3	4	-	25747427	25863760	2.3728	6.66254
ENSG00000091513	TF	3	+	133745956	133779006	0.0113358	0
ENSG00000091527	CDV3	3	+	133573730	133590261	21.9054	13.9974
ENSG00000091536	MYO15A	17	+	18108706	18179802	0.0368139	0.0153998
ENSG00000091542	ALKBH5	17	+	18183078	18209954	5.50122	62.3041
ENSG00000091583	APOH	17	-	66212033	66256525	0	0
ENSG00000091592	NLRP1	17	-	5499427	5619424	0.666992	0.0427131
ENSG00000091622	PITPNM3	17	-	6451264	6556494	2.58023	0.0707013
ENSG00000091640	SPAG7	17	-	4959226	4967872	3.92701	4.72492
ENSG00000091651	ORC6	16	+	46689643	46698394	7.87822	1.88569
ENSG00000091656	ZFHX4	8	+	76681219	76867285	0.384082	0.00332306
ENSG00000091664	SLC17A6	11	+	22338097	22379503	0	0
ENSG00000091704	CPA1	7	+	130380339	130388114	0	0.0477032
ENSG00000091732	ZC3HC1	7	-	130018286	130051451	11.3847	11.2928
ENSG00000091831	ESR1	6	+	151656691	152129619	0.755702	0.141069
ENSG00000091844	RGS17	6	-	153004459	153131249	0.233671	0.143102
ENSG00000091879	ANGPT2	8	-	6499651	6563409	0.127774	0.135815
ENSG00000091947	TMEM101	17	-	44011188	44023946	5.15296	4.16024
ENSG00000091972	CD200	3	+	112332347	112362812	0.0160696	0
ENSG00000091986	CCDC80	3	-	112596794	112649530	5.50107	0.160604
ENSG00000092009	CMA1	14	-	24505353	24508265	0.005899	0
ENSG00000092010	PSME1	14	+	24136158	24138967	59.1827	109.985
ENSG00000092020	PPP2R3C	14	-	35085467	35122517	3.91059	0.472515
ENSG00000092036	HAUS4	14	-	22946228	22957161	6.53325	21.6841
ENSG00000092051	JPH4	14	-	23568035	23578800	0.0096968	0.0217879
ENSG00000092054	MYH7	14	-	23412738	23435718	0.003948	0
ENSG00000092067	CEBPE	14	-	23117304	23119616	0.053235	0
ENSG00000092068	SLC7A8	14	-	23125295	23183674	0.115668	2.21689
ENSG00000092094	OSGEP	14	-	20446411	20455105	5.31877	5.35763
ENSG00000092096	SLC22A17	14	-	23346306	23352912	0.930334	0.678441
ENSG00000092098	RNF31	14	+	24146683	24160661	11.8221	5.56898
ENSG00000092108	SCFD1	14	+	30622112	30735812	9.16662	4.37015
ENSG00000092140	G2E3	14	+	30559123	30620063	3.6095	1.74946
ENSG00000092148	HECTD1	14	-	31100112	31207804	21.9815	18.9466
ENSG00000092199	HNRNPC	14	-	21209136	21269494	39.5253	39.8
ENSG00000092200	RPGRIP1	14	+	21287939	21351301	0.0194753	0.0937372
ENSG00000092201	SUPT16H	14	-	21351472	21384266	57.1564	34.2251
ENSG00000092203	TOX4	14	+	21476597	21499175	17.8666	12.773
ENSG00000092208	GEMIN2	14	+	39114223	39136973	5.46689	7.06238
ENSG00000092295	TGM1	14	-	24249114	24264432	1.33191	0.389146
ENSG00000092330	TINF2	14	-	24239643	24242674	12.1735	9.16888
ENSG00000092345	DAZL	3	-	16586792	16670306	0.0395348	0.68315
ENSG00000092377	TBL1Y	Y	+	6910686	7091683	0.075036	0
ENSG00000092421	SEMA6A	5	-	116443616	116574934	0.0822605	0.466933
ENSG00000092439	TRPM7	15	-	50552473	50686815	7.90934	5.16528
ENSG00000092445	TYRO3	15	+	41557675	41583586	3.18995	4.20565
ENSG00000092470	WDR76	15	+	43826963	43868419	7.47593	6.62403
ENSG00000092529	CAPN3	15	+	42359500	42412318	0	0.0143854
ENSG00000092531	SNAP23	15	+	42491233	42545356	1.8904	4.37119
ENSG00000092607	TBX15	1	-	118883046	118989556	0.818597	0.0526226
ENSG00000092621	PHGDH	1	+	119659798	119744215	56.369	62.8624
ENSG00000092758	COL9A3	20	+	62816244	62841159	0.359535	0.0188728
ENSG00000092820	EZR	6	-	158765741	158819412	153.78	90.2059
ENSG00000092841	MYL6	12	+	56158161	56163496	8.56714	28.2089
ENSG00000092847	AGO1	1	+	35869808	35930528	6.20582	9.25524
ENSG00000092850	TEKT2	1	+	36084075	36088275	0	0
ENSG00000092853	CLSPN	1	-	35720218	35769967	20.9163	7.10112
ENSG00000092871	RFFL	17	-	35005990	35089319	6.02625	8.14641
ENSG00000092929	UNC13D	17	-	75827225	75844717	11.4882	43.0756
ENSG00000092931	MFSD11	17	+	76735865	76781449	1.86249	4.36728
ENSG00000092964	DPYSL2	8	+	26514275	26658178	25.9982	11.8731
ENSG00000092969	TGFB2	1	+	218346235	218444619	0.7395	0.0344744
ENSG00000092978	GPATCH2	1	-	217426992	217631082	3.66663	2.22776
ENSG00000093000	NUP50	22	+	45163841	45188015	15.3896	11.4906
ENSG00000093009	CDC45	22	+	19479459	19520612	21.7324	19.2618
ENSG00000093010	COMT	22	+	19941607	19969975	4.55826	28.1398
ENSG00000093072	CECR1	22	-	17178790	17221989	0.019881	0.0607005
ENSG00000093100	.	22	-	17787652	17811497	0.606229	0.467357
ENSG00000093134	VNN3	6	-	132722787	132734765	0.0155382	0.01998
ENSG00000093144	ECHDC1	6	-	127288710	127343609	2.43259	2.86136
ENSG00000093167	LRRFIP2	3	-	37052656	37183689	2.07603	1.79561
ENSG00000093183	SEC22C	3	-	42547969	42601080	2.40599	2.07536
ENSG00000093217	XYLB	3	+	38346760	38421348	1.15136	1.64838
ENSG00000094631	HDAC6	X	+	48801377	48824982	6.86742	5.07909
[truncated: 45,253 more rows]
